# Supplementary material
Source: PubMed Central journal article supplement (PMC4506327)
Supplement: supp_bhu027_bhu027supp_table1.pdf [file supp_bhu027_bhu027supp_table1.pdf]

**Table S1. Population Demographics**

| <b>Longitudinal Infant Demographics</b>                     |                         |                        |
|-------------------------------------------------------------|-------------------------|------------------------|
|                                                             | <b>Singleton Cohort</b> | <b>Twin Cohort</b>     |
| <b>Total Subjects</b>                                       | 40                      | 31                     |
| <b>Gender</b>                                               |                         |                        |
| <i>Male</i>                                                 | 22                      | 15                     |
| <i>Female</i>                                               | 18                      | 16                     |
| <b>Ethnicity</b>                                            |                         |                        |
| <i>White</i>                                                | 30                      | 18                     |
| <i>Black</i>                                                | 10                      | 12                     |
| <i>Asian</i>                                                | 0                       | 0                      |
| <i>Indian</i>                                               | 0                       | 1                      |
| <b>Zygosity</b>                                             |                         |                        |
| <i>Monozygotic</i>                                          | -                       | 13                     |
| <i>Dizygotic</i>                                            | -                       | 18                     |
|                                                             | <b>Mean (SD)</b>        | <b>Mean (SD)</b>       |
| <b>Gestational Age at Birth (days)</b>                      | 274.4(9.80)             | 257.35 (7.35)          |
| <b>Birth Weight (grams)</b>                                 | 3,443.13 (500.95)       | 2,539.00 (337.04)      |
| <b>Maternal Age (yr)</b>                                    | 30.37 (4.90)            | 30.38 (6.44)           |
| <b>Maternal Education (yr)</b>                              | 15.01 (3.92)            | 13.77 (3.47)           |
| <b>Total Household Income</b>                               | \$64,486.84 (44,487.03) | \$59,534.58 (53457.39) |
| <b>Age at Neonatal MRI (weeks)</b>                          | 3.17 (1.23)             | 4.35 (1.66)            |
| <b>Age at Year 1 MRI (years)</b>                            | 1.05 (0.06)             | 1.10 (0.05)            |
| <b>Age at Year 2 MRI (years)</b>                            | 2.03 (0.06)             | 2.09 (0.09)            |
| <b>MSEL Early Learning Composite Year 1</b>                 | 118.10 (15.48)          | 117.26 (15.44)         |
| <b>MSEL Early Learning Composite Year 2</b>                 | 112.43 (13.46)          | 104.17 (15.70)         |
| <b>Adult Population Demographics</b>                        |                         |                        |
| <b>Total Subjects</b>                                       |                         | 44                     |
| <b>Gender</b>                                               |                         |                        |
| <i>Male</i>                                                 |                         | 21                     |
| <i>Female</i>                                               |                         | 23                     |
| <b>Ethnicity</b>                                            |                         |                        |
| <i>White</i>                                                |                         | 35                     |
| <i>Black</i>                                                |                         | 3                      |
| <i>Asian</i>                                                |                         | 6                      |
| <b>Mean Age (Years, SD)</b>                                 |                         | 29.44 (5.53)           |
| <i>MSEL; Mullen Scales of Early Learning (Mullen, 1995)</i> |                         |                        |
