# Supplementary material
Source: PubMed Central journal article supplement (PMC4506327)
Supplement: supp_bhu027_bhu027supp_table2.pdf [file supp_bhu027_bhu027supp_table2.pdf]

Table S2. Singleton Cortical Thickness

| ROI                    | LS Means - Year 0 | LS Means - Year 1 | LS Means - Year 2 | Difference in LS Means for Years 0 to 1 P-Value | Difference in LS Means for Years 1 to 2 P-Value | Difference in LS Means for Years 0 to 2 P-Value | Percent Change LS Means - Year 0 to 1 | Percent Change LS Means - Year 1 to 2 | Percent Change LS Means - Year 0 to 2 |
|------------------------|-------------------|-------------------|-------------------|-------------------------------------------------|-------------------------------------------------|-------------------------------------------------|---------------------------------------|---------------------------------------|---------------------------------------|
| <b>Central Region</b>  |                   |                   |                   |                                                 |                                                 |                                                 |                                       |                                       |                                       |
| Precentral_L           | 1.95 (0.03)       | 2.46 (0.03)       | 2.67 (0.03)       | 1.14E-29                                        | 1.24E-10                                        | 1.17E-34                                        | 26.56                                 | 8.51                                  | 37.33                                 |
| Precentral_R           | 1.86 (0.03)       | 2.38 (0.03)       | 2.60 (0.03)       | 3.86E-28                                        | 1.42E-10                                        | 3.32E-33                                        | 27.55                                 | 9.24                                  | 39.33                                 |
| Postcentral_L          | 2.01 (0.03)       | 2.19 (0.03)       | 2.41 (0.03)       | 2.58E-08                                        | 8.01E-11                                        | 6.00E-18                                        | 8.96                                  | 10.00                                 | 19.85                                 |
| Postcentral_R          | 1.91 (0.03)       | 2.07 (0.03)       | 2.28 (0.03)       | 3.56E-08                                        | 2.32E-12                                        | 4.61E-19                                        | 8.36                                  | 10.50                                 | 19.74                                 |
| Rolandic_Oper_L        | 2.15 (0.03)       | 3.35 (0.03)       | 3.33 (0.03)       | 4.26E-46                                        | 6.18E-01                                        | 5.17E-41                                        | 56.02                                 | -0.56                                 | 55.15                                 |
| Rolandic_Oper_R        | 2.23 (0.04)       | 3.42 (0.04)       | 3.39 (0.04)       | 6.64E-43                                        | 4.23E-01                                        | 1.35E-37                                        | 53.42                                 | -0.97                                 | 51.94                                 |
|                        |                   |                   |                   |                                                 |                                                 | Average % Change                                | 30.14                                 | 6.12                                  | 37.22                                 |
| <b>Frontal Lobe</b>    |                   |                   |                   |                                                 |                                                 |                                                 |                                       |                                       |                                       |
| <i>Lateral Surface</i> |                   |                   |                   |                                                 |                                                 |                                                 |                                       |                                       |                                       |
| Frontal_Sup_L          | 2.28 (0.04)       | 2.91 (0.04)       | 3.12 (0.04)       | 1.77E-24                                        | 5.79E-06                                        | 5.46E-27                                        | 27.76                                 | 7.05                                  | 36.76                                 |
| Frontal_Sup_R          | 2.14 (0.04)       | 2.75 (0.04)       | 2.97 (0.04)       | 1.14E-25                                        | 2.16E-07                                        | 8.70E-28                                        | 28.44                                 | 8.01                                  | 38.72                                 |
| Frontal_Mid_L          | 2.23 (0.04)       | 2.86 (0.04)       | 3.07 (0.04)       | 1.17E-28                                        | 1.85E-07                                        | 2.06E-30                                        | 28.36                                 | 7.17                                  | 37.57                                 |
| Frontal_Mid_R          | 2.25 (0.05)       | 2.90 (0.05)       | 3.09 (0.05)       | 1.26E-29                                        | 2.30E-06                                        | 2.04E-29                                        | 29.34                                 | 6.33                                  | 37.52                                 |
| Frontal_Inf_Oper_L     | 2.14 (0.03)       | 3.13 (0.03)       | 3.17 (0.03)       | 3.58E-44                                        | 2.22E-01                                        | 1.35E-39                                        | 46.27                                 | 1.28                                  | 48.15                                 |
| Frontal_Inf_Oper_R     | 2.09 (0.03)       | 3.10 (0.03)       | 3.14 (0.03)       | 8.23E-44                                        | 2.57E-01                                        | 3.14E-41                                        | 48.66                                 | 1.25                                  | 50.52                                 |
| Frontal_Inf_Tri_L      | 2.27 (0.03)       | 3.04 (0.03)       | 3.16 (0.03)       | 1.39E-40                                        | 7.85E-05                                        | 9.68E-38                                        | 33.71                                 | 3.91                                  | 38.94                                 |
| Frontal_Inf_Tri_R      | 2.22 (0.04)       | 2.97 (0.04)       | 3.08 (0.04)       | 6.60E-32                                        | 4.58E-03                                        | 4.04E-29                                        | 33.83                                 | 3.71                                  | 38.79                                 |
|                        |                   |                   |                   |                                                 |                                                 | Average % Change                                | 34.55                                 | 4.84                                  | 40.87                                 |
| <i>Medial Surface</i>  |                   |                   |                   |                                                 |                                                 |                                                 |                                       |                                       |                                       |
| Frontal_Sup_Medial_L   | 2.46 (0.05)       | 3.84 (0.05)       | 3.83 (0.05)       | 1.39E-41                                        | 8.52E-01                                        | 2.70E-35                                        | 56.24                                 | -0.24                                 | 55.86                                 |
| Frontal_Sup_Medial_R   | 2.53 (0.06)       | 3.67 (0.06)       | 3.75 (0.06)       | 4.30E-31                                        | 1.97E-01                                        | 6.44E-27                                        | 45.26                                 | 2.09                                  | 48.31                                 |
| Supp_Motor_Area_L      | 2.21 (0.04)       | 3.12 (0.04)       | 3.12 (0.04)       | 3.49E-31                                        | 9.89E-01                                        | 1.41E-26                                        | 40.82                                 | -0.02                                 | 40.79                                 |
| Supp_Motor_Area_R      | 2.24 (0.04)       | 3.11 (0.04)       | 3.21 (0.04)       | 1.98E-37                                        | 6.35E-03                                        | 2.57E-34                                        | 39.17                                 | 3.27                                  | 43.72                                 |
| Paracentral_Lobule_L   | 1.83 (0.03)       | 2.14 (0.03)       | 2.28 (0.03)       | 7.38E-19                                        | 2.74E-06                                        | 2.00E-21                                        | 17.22                                 | 6.31                                  | 24.61                                 |
| Paracentral_Lobule_R   | 1.88 (0.04)       | 2.36 (0.04)       | 2.56 (0.04)       | 2.07E-22                                        | 1.39E-07                                        | 1.35E-25                                        | 25.72                                 | 8.61                                  | 36.54                                 |
|                        |                   |                   |                   |                                                 |                                                 | Average % Change                                | 37.41                                 | 3.34                                  | 41.64                                 |
| <i>Orbital Surface</i> |                   |                   |                   |                                                 |                                                 |                                                 |                                       |                                       |                                       |
| Frontal_Sup_Orb_L      | 2.65 (0.08)       | 3.45 (0.08)       | 3.61 (0.08)       | 5.78E-14                                        | 7.23E-02                                        | 6.20E-15                                        | 30.34                                 | 4.62                                  | 36.35                                 |
| Frontal_Sup_Orb_R      | 2.58 (0.07)       | 3.36 (0.07)       | 3.44 (0.07)       | 6.46E-18                                        | 2.22E-01                                        | 4.15E-16                                        | 30.25                                 | 2.53                                  | 33.55                                 |
| Frontal_Med_Orb_L      | 2.57 (0.06)       | 3.70 (0.06)       | 3.70 (0.06)       | 1.13E-27                                        | 9.53E-01                                        | 2.33E-23                                        | 44.07                                 | 0.11                                  | 44.22                                 |
| Frontal_Med_Orb_R      | 2.53 (0.06)       | 3.62 (0.06)       | 3.42 (0.06)       | 7.96E-28                                        | 1.95E-03                                        | 2.83E-18                                        | 42.84                                 | -5.62                                 | 34.81                                 |
| Frontal_Mid_Orb_L      | 2.52 (0.08)       | 3.38 (0.08)       | 3.60 (0.08)       | 2.17E-12                                        | 3.51E-02                                        | 1.20E-14                                        | 34.10                                 | 6.52                                  | 42.84                                 |
| Frontal_Mid_Orb_R      | 2.60 (0.08)       | 3.50 (0.08)       | 3.66 (0.08)       | 4.59E-14                                        | 9.73E-02                                        | 5.10E-15                                        | 34.68                                 | 4.68                                  | 40.98                                 |
| Frontal_Inf_Orb_L      | 2.54 (0.06)       | 3.51 (0.06)       | 3.65 (0.06)       | 3.90E-25                                        | 3.40E-02                                        | 1.18E-24                                        | 38.21                                 | 3.87                                  | 43.56                                 |
| Frontal_Inf_Orb_R      | 2.53 (0.06)       | 3.53 (0.06)       | 3.66 (0.06)       | 1.57E-26                                        | 4.47E-02                                        | 1.10E-25                                        | 39.48                                 | 3.54                                  | 44.43                                 |
| Rectus_L               | 2.74 (0.09)       | 3.81 (0.09)       | 3.82 (0.09)       | 3.75E-18                                        | 9.50E-01                                        | 7.04E-15                                        | 39.26                                 | 0.15                                  | 39.48                                 |
| Rectus_R               | 2.55 (0.08)       | 3.64 (0.08)       | 3.39 (0.08)       | 1.52E-20                                        | 4.70E-03                                        | 6.30E-12                                        | 42.59                                 | -6.83                                 | 32.86                                 |
| Olfactory_L            | 2.10 (0.10)       | 3.09 (0.10)       | 3.31 (0.10)       | 5.72E-17                                        | 1.79E-02                                        | 1.77E-16                                        | 47.03                                 | 7.19                                  | 57.60                                 |
| Olfactory_R            | 1.98 (0.08)       | 2.92 (0.08)       | 3.11 (0.08)       | 1.13E-20                                        | 1.11E-02                                        | 5.76E-20                                        | 47.01                                 | 6.50                                  | 56.56                                 |
|                        |                   |                   |                   |                                                 |                                                 | Average % Change                                | 39.16                                 | 2.27                                  | 42.27                                 |
| <b>Temporal Lobe</b>   |                   |                   |                   |                                                 |                                                 |                                                 |                                       |                                       |                                       |
| Temporal_Sup_L         | 2.30 (0.04)       | 3.21 (0.04)       | 3.25 (0.04)       | 1.57E-39                                        | 2.92E-01                                        | 1.13E-34                                        | 39.56                                 | 1.16                                  | 41.17                                 |
| Temporal_Sup_R         | 2.25 (0.04)       | 3.24 (0.04)       | 3.27 (0.04)       | 2.99E-38                                        | 4.09E-01                                        | 5.69E-35                                        | 43.81                                 | 1.02                                  | 45.27                                 |
| Heschl_L               | 2.10 (0.04)       | 3.00 (0.04)       | 3.09 (0.04)       | 1.11E-32                                        | 4.50E-02                                        | 1.61E-30                                        | 42.82                                 | 2.98                                  | 47.08                                 |
| Heschl_R               | 2.12 (0.05)       | 3.32 (0.05)       | 3.40 (0.05)       | 1.32E-41                                        | 5.17E-02                                        | 5.48E-37                                        | 56.83                                 | 2.57                                  | 60.87                                 |
| Temporal_Mid_L         | 2.34 (0.03)       | 3.14 (0.03)       | 3.14 (0.03)       | 6.71E-33                                        | 9.19E-01                                        | 1.47E-29                                        | 34.23                                 | -0.13                                 | 34.06                                 |
| Temporal_Mid_R         | 2.21 (0.03)       | 3.02 (0.03)       | 3.04 (0.03)       | 6.95E-32                                        | 6.92E-01                                        | 3.22E-30                                        | 37.15                                 | 0.54                                  | 37.90                                 |
| Temporal_Inf_L         | 2.33 (0.04)       | 3.01 (0.04)       | 3.21 (0.04)       | 8.52E-22                                        | 1.12E-04                                        | 8.24E-25                                        | 28.84                                 | 6.78                                  | 37.58                                 |
| Temporal_Inf_R         | 2.30 (0.04)       | 2.90 (0.04)       | 3.01 (0.04)       | 2.12E-27                                        | 4.26E-03                                        | 1.72E-26                                        | 26.19                                 | 3.63                                  | 30.77                                 |
| Temporal_Pole_Sup_L    | 3.00 (0.06)       | 4.18 (0.06)       | 4.31 (0.06)       | 8.60E-31                                        | 3.64E-02                                        | 5.90E-29                                        | 39.21                                 | 3.14                                  | 43.57                                 |
| Temporal_Pole_Sup_R    | 3.10 (0.06)       | 4.28 (0.06)       | 4.37 (0.06)       | 1.73E-30                                        | 1.58E-01                                        | 4.11E-27                                        | 38.01                                 | 2.07                                  | 40.87                                 |
| Temporal_Pole_Mid_L    | 3.47 (0.09)       | 4.08 (0.09)       | 4.14 (0.09)       | 4.66E-08                                        | 5.17E-01                                        | 2.05E-07                                        | 17.65                                 | 1.61                                  | 19.54                                 |
| Temporal_Pole_Mid_R    | 3.23 (0.09)       | 3.87 (0.09)       | 4.01 (0.09)       | 6.21E-10                                        | 1.48E-01                                        | 3.86E-10                                        | 20.05                                 | 3.44                                  | 24.18                                 |
|                        |                   |                   |                   |                                                 |                                                 | Average % Change                                | 35.36                                 | 2.40                                  | 38.57                                 |
| <b>Insula</b>          |                   |                   |                   |                                                 |                                                 |                                                 |                                       |                                       |                                       |
| Insula_L               | 2.24 (0.03)       | 3.58 (0.03)       | 3.61 (0.03)       | 6.39E-51                                        | 4.65E-01                                        | 3.71E-49                                        | 59.61                                 | 0.73                                  | 60.77                                 |
| Insula_R               | 2.04 (0.03)       | 3.38 (0.03)       | 3.42 (0.03)       | 7.70E-50                                        | 2.13E-01                                        | 1.45E-49                                        | 65.83                                 | 1.37                                  | 68.11                                 |
|                        |                   |                   |                   |                                                 |                                                 | Average % Change                                | 62.72                                 | 1.05                                  | 64.44                                 |
| <b>Cingulate</b>       |                   |                   |                   |                                                 |                                                 |                                                 |                                       |                                       |                                       |
| Cingulate_Ant_L        | 2.16 (0.04)       | 3.41 (0.04)       | 3.19 (0.04)       | 3.08E-42                                        | 3.98E-06                                        | 5.87E-32                                        | 58.11                                 | -6.43                                 | 47.95                                 |
| Cingulate_Ant_R        | 2.24 (0.04)       | 3.48 (0.04)       | 3.35 (0.04)       | 4.11E-45                                        | 2.18E-03                                        | 6.07E-37                                        | 55.30                                 | -3.62                                 | 49.69                                 |
| Cingulate_Mid_L        | 1.98 (0.03)       | 2.92 (0.03)       | 2.87 (0.03)       | 3.18E-38                                        | 1.73E-01                                        | 1.62E-32                                        | 47.92                                 | -1.79                                 | 45.26                                 |
| Cingulate_Mid_R        | 2.01 (0.02)       | 2.91 (0.02)       | 2.89 (0.02)       | 4.44E-43                                        | 4.71E-01                                        | 5.20E-40                                        | 44.41                                 | -0.76                                 | 43.31                                 |
| Cingulate_Post_L       | 1.64 (0.05)       | 2.03 (0.05)       | 2.16 (0.05)       | 2.50E-09                                        | 2.40E-02                                        | 2.15E-11                                        | 23.15                                 | 6.40                                  | 31.03                                 |
| Cingulate_Post_R       | 1.39 (0.05)       | 1.89 (0.05)       | 1.91 (0.05)       | 3.03E-11                                        | 6.97E-01                                        | 2.64E-10                                        | 35.43                                 | 1.32                                  | 37.22                                 |
|                        |                   |                   |                   |                                                 |                                                 | Average % Change                                | 44.05                                 | -0.81                                 | 42.41                                 |
| <b>Parietal Lobe</b>   |                   |                   |                   |                                                 |                                                 |                                                 |                                       |                                       |                                       |
| Parietal_Sup_L         | 2.09 (0.05)       | 2.28 (0.05)       | 2.59 (0.05)       | 5.65E-05                                        | 1.29E-09                                        | 1.22E-13                                        | 9.24                                  | 13.70                                 | 24.21                                 |
| Parietal_Sup_R         | 2.15 (0.06)       | 2.21 (0.06)       | 2.60 (0.06)       | 2.80E-01                                        | 1.41E-09                                        | 5.05E-09                                        | 2.89                                  | 17.78                                 | 21.18                                 |
| Parietal_Inf_L         | 2.13 (0.04)       | 2.72 (0.04)       | 2.92 (0.04)       | 3.35E-22                                        | 2.59E-05                                        | 2.53E-26                                        | 27.80                                 | 7.12                                  | 36.90                                 |
| Parietal_Inf_R         | 2.03 (0.04)       | 2.65 (0.04)       | 2.86 (0.04)       | 1.22E-24                                        | 5.55E-06                                        | 7.18E-28                                        | 30.91                                 | 7.63                                  | 40.90                                 |
| Angular_L              | 2.23 (0.04)       | 2.89 (0.04)       | 3.08 (0.04)       | 1.95E-23                                        | 7.34E-05                                        | 1.16E-25                                        | 29.74                                 | 6.67                                  | 38.39                                 |
| Angular_R              | 2.14 (0.04)       | 2.77 (0.04)       | 2.96 (0.04)       | 1.10E-20                                        | 1.58E-04                                        | 1.35E-24                                        | 29.03                                 | 6.98                                  | 38.04                                 |
| SupraMarginal_L        | 2.32 (0.04)       | 3.04 (0.04)       | 3.19 (0.04)       | 1.57E-29                                        | 3.41E-04                                        | 3.78E-29                                        | 31.43                                 | 4.91                                  | 37.88                                 |
| SupraMarginal_R        | 2.16 (0.04)       | 2.90 (0.04)       | 2.99 (0.04)       | 7.27E-23                                        | 7.97E-02                                        | 2.27E-24                                        | 34.00                                 | 3.20                                  | 38.29                                 |
| Precuneus_L            | 2.15 (0.03)       | 2.78 (0.03)       | 2.88 (0.03)       | 4.29E-33                                        | 1.30E-03                                        | 3.76E-32                                        | 29.28                                 | 3.64                                  | 33.99                                 |
| Precuneus_R            | 2.05 (0.04)       | 2.85 (0.04)       | 2.91 (0.04)       | 4.93E-42                                        | 3.76E-02                                        | 4.51E-36                                        | 38.76                                 | 2.09                                  | 41.66                                 |
|                        |                   |                   |                   |                                                 |                                                 | Average % Change                                | 26.31                                 | 7.37                                  | 35.14                                 |
| <b>Occipital Lobe</b>  |                   |                   |                   |                                                 |                                                 |                                                 |                                       |                                       |                                       |
| Occipital_Sup_L        | 2.04 (0.03)       | 2.41 (0.03)       | 2.55 (0.03)       | 2.50E-23                                        | 5.59E-07                                        | 5.41E-25                                        | 18.15                                 | 5.86                                  | 25.07                                 |
| Occipital_Sup_R        | 2.12 (0.04)       | 2.29 (0.04)       | 2.45 (0.04)       | 1.59E-04                                        | 3.98E-04                                        | 5.37E-09                                        | 8.10                                  | 6.98                                  | 15.64                                 |
| Occipital_Mid_L        | 2.09 (0.03)       | 2.51 (0.03)       | 2.62 (0.03)       | 1.93E-21                                        | 1.09E-03                                        | 8.33E-23                                        | 20.49                                 | 4.36                                  | 25.74                                 |
| Occipital_Mid_R        | 2.03 (0.03)       | 2.33 (0.03)       | 2.46 (0.03)       | 1.72E-16                                        | 1.69E-05                                        | 1.10E-20                                        | 14.77                                 | 5.62                                  | 21.21                                 |
| Occipital_Inf_L        | 2.18 (0.05)       | 2.40 (0.05)       | 2.60 (0.05)       | 4.26E-04                                        | 1.29E-03                                        | 3.81E-08                                        | 10.08                                 | 8.30                                  | 19.22                                 |
| Occipital_Inf_R        | 2.21 (0.04)       | 2.17 (0.04)       | 2.34 (0.04)       | 4.30E-01                                        | 1.27E-03                                        | 2.77E-02                                        | -1.88                                 | 8.06                                  | 6.04                                  |
| Cuneus_L               | 2.07 (0.04)       | 2.54 (0.04)       | 2.60 (0.04)       | 1.79E-17                                        | 1.65E-01                                        | 3.45E-17                                        | 23.06                                 | 2.38                                  | 25.99                                 |
| Cuneus_R               | 2.25 (0.04)       | 2.61 (0.04)       | 2.68 (0.04)       | 1.41E-10                                        | 1.07E-01                                        | 2.22E-12                                        | 15.75                                 | 2.99                                  | 19.21                                 |
| Calcarine_L            | 2.09 (0.04)       | 2.30 (0.04)       | 2.43 (0.04)       | 5.66E-07                                        | 1.30E-03                                        | 9.40E-11                                        | 10.09                                 | 5.60                                  | 16.25                                 |
| Calcarine_R            | 2.18 (0.04)       | 2.31 (0.04)       | 2.43 (0.04)       | 1.18E-03                                        | 2.39E-03                                        | 9.23E-07                                        | 5.97                                  | 5.25                                  | 11.53                                 |
| Lingual_L              | 2.17 (0.04)       | 2.12 (0.04)       | 2.38 (0.04)       | 1.67E-01                                        | 2.77E-09                                        | 1.74E-05                                        | -2.50                                 | 12.36                                 | 9.56                                  |
| Lingual_R              | 2.20 (0.03)       | 2.19 (0.03)       | 2.40 (0.03)       | 7.91E-01                                        | 6.12E-06                                        | 6.35E-05                                        | -0.52                                 | 9.60                                  | 9.03                                  |
| Fusiform_L             | 2.19 (0.04)       | 2.20 (0.04)       | 2.53 (0.04)       | 7.45E-01                                        | 6.35E-10                                        | 6.44E-09                                        | 0.69                                  | 14.89                                 | 15.68                                 |
| Fusiform_R             | 2.20 (0.03)       | 2.28 (0.03)       | 2.58 (0.03)       | 4.72E-02                                        | 9.65E-10                                        | 2.15E-12                                        | 3.85                                  | 12.83                                 | 17.17                                 |
|                        |                   |                   |                   |                                                 |                                                 | Average % Change                                | 9.01                                  | 7.50                                  | 16.95                                 |
| 19 20 21               |                   |                   |                   |                                                 |                                                 |                                                 |                                       |                                       |                                       |
