# Supplementary material
Source: PubMed Central journal article supplement (PMC4506327)
Supplement: supp_bhu027_bhu027supp_table3.pdf [file supp_bhu027_bhu027supp_table3.pdf]

Table S3. Twin Cortical Thickness

| ROI                    | LS Means - Year 0 | LS Means - Year 1 | LS Means - Year 2 | Difference in LS Means for Years 0 to 1 P-Value | Difference in LS Means for Years 1 to 2 P-Value | Difference in LS Means for Years 0 to 2 P-Value | Percent Change LS Means - Year 0 to 1 | Percent Change LS Means - Year 1 to 2 | Percent Change LS Means - Year 0 to 2 |
|------------------------|-------------------|-------------------|-------------------|-------------------------------------------------|-------------------------------------------------|-------------------------------------------------|---------------------------------------|---------------------------------------|---------------------------------------|
| <b>Central Region</b>  |                   |                   |                   |                                                 |                                                 |                                                 |                                       |                                       |                                       |
| Precentral_L           | 1.95 (0.02)       | 2.50 (0.02)       | 2.77 (0.02)       | 4.55E-34                                        | 8.91E-19                                        | 4.57E-39                                        | 28.33                                 | 10.81                                 | 42.20                                 |
| Precentral_R           | 1.86 (0.02)       | 2.38 (0.02)       | 2.66 (0.02)       | 6.64E-33                                        | 4.96E-20                                        | 4.14E-38                                        | 27.81                                 | 11.97                                 | 43.11                                 |
| Postcentral_L          | 1.97 (0.02)       | 2.12 (0.02)       | 2.43 (0.02)       | 1.90E-08                                        | 4.60E-19                                        | 1.17E-23                                        | 7.72                                  | 14.47                                 | 23.30                                 |
| Postcentral_R          | 1.86 (0.02)       | 2.02 (0.02)       | 2.29 (0.02)       | 7.92E-09                                        | 6.38E-17                                        | 1.62E-23                                        | 8.51                                  | 13.63                                 | 23.30                                 |
| Rolandic_Oper_L        | 2.08 (0.03)       | 3.36 (0.03)       | 3.34 (0.03)       | 3.68E-42                                        | 6.57E-01                                        | 2.17E-37                                        | 61.09                                 | -0.46                                 | 60.36                                 |
| Rolandic_Oper_R        | 2.15 (0.03)       | 3.40 (0.03)       | 3.40 (0.03)       | 2.45E-42                                        | 8.86E-01                                        | 4.37E-38                                        | 58.16                                 | 0.14                                  | 58.39                                 |
|                        |                   |                   |                   |                                                 |                                                 | Average % Change                                | 31.94                                 | 8.43                                  | 41.78                                 |
| <b>Frontal Lobe</b>    |                   |                   |                   |                                                 |                                                 |                                                 |                                       |                                       |                                       |
| <b>Lateral Surface</b> |                   |                   |                   |                                                 |                                                 |                                                 |                                       |                                       |                                       |
| Frontal_Sup_L          | 2.27 (0.03)       | 3.00 (0.03)       | 3.30 (0.03)       | 3.30E-32                                        | 3.82E-14                                        | 2.29E-35                                        | 32.39                                 | 9.96                                  | 45.58                                 |
| Frontal_Sup_R          | 2.13 (0.03)       | 2.81 (0.03)       | 3.13 (0.03)       | 7.65E-27                                        | 2.81E-12                                        | 2.78E-31                                        | 32.13                                 | 11.13                                 | 46.84                                 |
| Frontal_Mid_L          | 2.21 (0.03)       | 2.88 (0.03)       | 3.19 (0.03)       | 1.32E-34                                        | 5.93E-18                                        | 1.27E-38                                        | 30.38                                 | 10.67                                 | 44.29                                 |
| Frontal_Mid_R          | 2.24 (0.03)       | 2.93 (0.03)       | 3.21 (0.03)       | 1.96E-36                                        | 6.91E-17                                        | 1.83E-38                                        | 30.89                                 | 9.43                                  | 43.23                                 |
| Frontal_Inf_Oper_L     | 2.09 (0.03)       | 3.07 (0.03)       | 3.16 (0.03)       | 3.11E-37                                        | 1.02E-02                                        | 1.73E-34                                        | 47.34                                 | 2.82                                  | 51.50                                 |
| Frontal_Inf_Oper_R     | 2.06 (0.03)       | 3.12 (0.03)       | 3.18 (0.03)       | 2.06E-40                                        | 4.65E-02                                        | 2.27E-37                                        | 50.92                                 | 1.98                                  | 53.91                                 |
| Frontal_Inf_Tri_L      | 2.26 (0.02)       | 3.08 (0.02)       | 3.19 (0.02)       | 1.67E-39                                        | 4.40E-05                                        | 8.76E-38                                        | 36.38                                 | 3.54                                  | 41.20                                 |
| Frontal_Inf_Tri_R      | 2.23 (0.03)       | 3.03 (0.03)       | 3.18 (0.03)       | 1.41E-39                                        | 1.58E-07                                        | 7.79E-38                                        | 36.25                                 | 4.75                                  | 42.72                                 |
|                        |                   |                   |                   |                                                 |                                                 | Average % Change                                | 37.08                                 | 6.79                                  | 46.16                                 |
| <b>Medial Surface</b>  |                   |                   |                   |                                                 |                                                 |                                                 |                                       |                                       |                                       |
| Frontal_Sup_Medial_L   | 2.44 (0.04)       | 4.00 (0.04)       | 4.01 (0.04)       | 2.51E-40                                        | 7.93E-01                                        | 1.02E-36                                        | 64.08                                 | 0.30                                  | 64.57                                 |
| Frontal_Sup_Medial_R   | 2.42 (0.05)       | 3.62 (0.05)       | 3.69 (0.05)       | 9.16E-31                                        | 2.13E-01                                        | 1.94E-27                                        | 49.88                                 | 1.83                                  | 52.62                                 |
| Supp_Motor_Area_L      | 2.25 (0.04)       | 3.17 (0.04)       | 3.26 (0.04)       | 8.89E-30                                        | 2.48E-02                                        | 7.49E-29                                        | 40.80                                 | 3.04                                  | 45.08                                 |
| Supp_Motor_Area_R      | 2.17 (0.04)       | 3.18 (0.04)       | 3.32 (0.04)       | 2.38E-28                                        | 4.63E-03                                        | 8.50E-28                                        | 46.45                                 | 4.54                                  | 53.10                                 |
| Paracentral_Lobule_L   | 1.86 (0.03)       | 2.11 (0.03)       | 2.31 (0.03)       | 2.33E-09                                        | 3.61E-07                                        | 2.67E-15                                        | 13.52                                 | 9.69                                  | 24.51                                 |
| Paracentral_Lobule_R   | 1.68 (0.05)       | 2.24 (0.05)       | 2.52 (0.05)       | 3.05E-14                                        | 3.03E-06                                        | 1.93E-19                                        | 32.84                                 | 12.77                                 | 49.81                                 |
|                        |                   |                   |                   |                                                 |                                                 | Average % Change                                | 41.26                                 | 5.36                                  | 48.28                                 |
| <b>Orbital Surface</b> |                   |                   |                   |                                                 |                                                 |                                                 |                                       |                                       |                                       |
| Frontal_Sup_Orb_L      | 2.58 (0.05)       | 3.76 (0.05)       | 3.81 (0.05)       | 8.20E-32                                        | 2.71E-01                                        | 3.36E-28                                        | 45.90                                 | 1.46                                  | 48.02                                 |
| Frontal_Sup_Orb_R      | 2.50 (0.05)       | 3.55 (0.05)       | 3.60 (0.05)       | 1.72E-30                                        | 2.85E-01                                        | 5.32E-27                                        | 42.05                                 | 1.41                                  | 44.05                                 |
| Frontal_Med_Orb_L      | 2.49 (0.05)       | 3.88 (0.05)       | 3.83 (0.05)       | 5.97E-33                                        | 3.59E-01                                        | 5.28E-28                                        | 55.85                                 | -1.32                                 | 53.80                                 |
| Frontal_Med_Orb_R      | 2.45 (0.05)       | 3.75 (0.05)       | 3.35 (0.05)       | 6.78E-31                                        | 2.15E-09                                        | 3.74E-19                                        | 53.09                                 | -10.65                                | 36.79                                 |
| Frontal_Mid_Orb_L      | 2.53 (0.05)       | 3.77 (0.05)       | 3.87 (0.05)       | 5.19E-36                                        | 2.62E-02                                        | 1.05E-32                                        | 48.88                                 | 2.61                                  | 52.75                                 |
| Frontal_Mid_Orb_R      | 2.49 (0.05)       | 3.69 (0.05)       | 3.77 (0.05)       | 2.98E-33                                        | 1.27E-01                                        | 2.48E-29                                        | 48.15                                 | 1.97                                  | 51.07                                 |
| Frontal_Inf_Orb_L      | 2.49 (0.04)       | 3.79 (0.04)       | 3.83 (0.04)       | 1.70E-44                                        | 2.38E-01                                        | 1.95E-39                                        | 52.03                                 | 1.00                                  | 53.54                                 |
| Frontal_Inf_Orb_R      | 2.50 (0.03)       | 3.77 (0.03)       | 3.80 (0.03)       | 3.31E-45                                        | 3.45E-01                                        | 7.71E-41                                        | 51.01                                 | 0.76                                  | 52.16                                 |
| Rectus_L               | 2.53 (0.07)       | 4.08 (0.07)       | 4.06 (0.07)       | 8.47E-28                                        | 7.75E-01                                        | 1.19E-23                                        | 61.49                                 | -0.54                                 | 60.62                                 |
| Rectus_R               | 2.28 (0.10)       | 3.75 (0.10)       | 3.42 (0.10)       | 1.32E-20                                        | 2.42E-03                                        | 8.45E-13                                        | 64.62                                 | -8.74                                 | 50.24                                 |
| Olfactory_L            | 2.04 (0.07)       | 3.09 (0.07)       | 3.36 (0.07)       | 3.61E-19                                        | 1.05E-03                                        | 7.93E-21                                        | 51.34                                 | 8.85                                  | 64.73                                 |
| Olfactory_R            | 1.80 (0.06)       | 2.87 (0.06)       | 3.13 (0.06)       | 1.36E-23                                        | 1.58E-04                                        | 4.93E-25                                        | 58.88                                 | 9.07                                  | 73.29                                 |
|                        |                   |                   |                   |                                                 |                                                 | Average % Change                                | 52.77                                 | 0.49                                  | 53.42                                 |
| <b>Temporal Lobe</b>   |                   |                   |                   |                                                 |                                                 |                                                 |                                       |                                       |                                       |
| Temporal_Sup_L         | 2.24 (0.03)       | 3.24 (0.03)       | 3.34 (0.03)       | 7.51E-38                                        | 2.60E-03                                        | 2.32E-36                                        | 44.51                                 | 3.12                                  | 49.01                                 |
| Temporal_Sup_R         | 2.23 (0.03)       | 3.28 (0.03)       | 3.37 (0.03)       | 2.54E-42                                        | 2.40E-03                                        | 8.45E-39                                        | 46.81                                 | 2.70                                  | 50.78                                 |
| Heschl_L               | 2.02 (0.04)       | 2.93 (0.04)       | 3.02 (0.04)       | 5.04E-28                                        | 3.64E-02                                        | 6.57E-27                                        | 44.84                                 | 3.27                                  | 49.58                                 |
| Heschl_R               | 2.12 (0.04)       | 3.27 (0.04)       | 3.36 (0.04)       | 1.12E-31                                        | 6.47E-02                                        | 1.67E-29                                        | 54.20                                 | 2.77                                  | 58.48                                 |
| Temporal_Mid_L         | 2.27 (0.02)       | 3.14 (0.02)       | 3.23 (0.02)       | 3.20E-45                                        | 2.11E-05                                        | 5.45E-42                                        | 38.07                                 | 3.03                                  | 42.25                                 |
| Temporal_Mid_R         | 2.17 (0.02)       | 3.07 (0.02)       | 3.16 (0.02)       | 3.56E-47                                        | 1.05E-04                                        | 2.21E-43                                        | 41.43                                 | 2.67                                  | 45.20                                 |
| Temporal_Inf_L         | 2.29 (0.04)       | 3.06 (0.04)       | 3.21 (0.04)       | 1.11E-29                                        | 5.88E-05                                        | 5.76E-29                                        | 33.59                                 | 4.99                                  | 40.25                                 |
| Temporal_Inf_R         | 2.30 (0.03)       | 2.92 (0.03)       | 3.10 (0.03)       | 9.35E-34                                        | 1.08E-09                                        | 2.70E-33                                        | 27.11                                 | 5.93                                  | 34.65                                 |
| Temporal_Pole_Sup_L    | 2.86 (0.04)       | 4.28 (0.04)       | 4.44 (0.04)       | 7.75E-42                                        | 9.19E-05                                        | 8.43E-39                                        | 49.41                                 | 3.79                                  | 55.07                                 |
| Temporal_Pole_Sup_R    | 2.98 (0.04)       | 4.33 (0.04)       | 4.46 (0.04)       | 1.15E-40                                        | 1.02E-03                                        | 5.95E-38                                        | 45.38                                 | 3.09                                  | 49.87                                 |
| Temporal_Pole_Mid_L    | 3.29 (0.07)       | 4.22 (0.07)       | 4.27 (0.07)       | 3.46E-20                                        | 5.03E-01                                        | 3.22E-17                                        | 28.42                                 | 1.07                                  | 29.79                                 |
| Temporal_Pole_Mid_R    | 3.11 (0.06)       | 4.07 (0.06)       | 4.11 (0.06)       | 1.29E-24                                        | 4.53E-01                                        | 7.84E-21                                        | 30.84                                 | 1.03                                  | 32.19                                 |
|                        |                   |                   |                   |                                                 |                                                 | Average % Change                                | 40.38                                 | 3.12                                  | 44.76                                 |
| <b>Insula</b>          |                   |                   |                   |                                                 |                                                 |                                                 |                                       |                                       |                                       |
| Insula_L               | 2.18 (0.02)       | 3.62 (0.02)       | 3.68 (0.02)       | 1.21E-49                                        | 3.90E-02                                        | 2.15E-47                                        | 66.22                                 | 1.67                                  | 68.99                                 |
| Insula_R               | 1.93 (0.02)       | 3.34 (0.02)       | 3.38 (0.02)       | 6.74E-56                                        | 1.14E-01                                        | 1.26E-51                                        | 73.61                                 | 1.05                                  | 75.43                                 |
|                        |                   |                   |                   |                                                 |                                                 | Average % Change                                | 69.92                                 | 1.36                                  | 72.21                                 |
| <b>Cingulate</b>       |                   |                   |                   |                                                 |                                                 |                                                 |                                       |                                       |                                       |
| Cingulate_Ant_L        | 2.09 (0.04)       | 3.36 (0.04)       | 3.16 (0.04)       | 1.23E-36                                        | 1.82E-05                                        | 3.58E-29                                        | 61.06                                 | -6.00                                 | 51.40                                 |
| Cingulate_Ant_R        | 2.14 (0.04)       | 3.47 (0.04)       | 3.27 (0.04)       | 5.73E-39                                        | 3.69E-06                                        | 7.06E-30                                        | 62.10                                 | -6.02                                 | 52.35                                 |
| Cingulate_Mid_L        | 2.03 (0.03)       | 2.99 (0.03)       | 2.91 (0.03)       | 1.63E-39                                        | 6.08E-03                                        | 3.23E-33                                        | 47.59                                 | -2.76                                 | 43.52                                 |
| Cingulate_Mid_R        | 1.95 (0.03)       | 2.93 (0.03)       | 2.84 (0.03)       | 2.26E-40                                        | 2.53E-03                                        | 3.44E-34                                        | 50.70                                 | -3.08                                 | 46.07                                 |
| Cingulate_Post_L       | 1.72 (0.06)       | 2.17 (0.06)       | 2.26 (0.06)       | 2.64E-11                                        | 1.33E-01                                        | 9.34E-11                                        | 26.57                                 | 3.89                                  | 31.50                                 |
| Cingulate_Post_R       | 1.37 (0.06)       | 1.99 (0.06)       | 1.94 (0.06)       | 6.91E-13                                        | 4.29E-01                                        | 1.63E-09                                        | 45.84                                 | -2.73                                 | 41.86                                 |
|                        |                   |                   |                   |                                                 |                                                 | Average % Change                                | 48.98                                 | -2.78                                 | 44.45                                 |
| <b>Parietal Lobe</b>   |                   |                   |                   |                                                 |                                                 |                                                 |                                       |                                       |                                       |
| Parietal_Sup_L         | 1.97 (0.03)       | 2.25 (0.03)       | 2.60 (0.03)       | 1.12E-13                                        | 2.87E-17                                        | 2.96E-24                                        | 14.41                                 | 15.58                                 | 32.24                                 |
| Parietal_Sup_R         | 1.99 (0.04)       | 2.16 (0.04)       | 2.66 (0.04)       | 4.85E-04                                        | 3.33E-15                                        | 2.80E-18                                        | 8.67                                  | 22.89                                 | 33.55                                 |
| Parietal_Inf_L         | 2.06 (0.02)       | 2.74 (0.02)       | 2.97 (0.02)       | 3.59E-40                                        | 3.92E-16                                        | 2.48E-41                                        | 33.38                                 | 8.19                                  | 44.30                                 |
| Parietal_Inf_R         | 1.99 (0.03)       | 2.66 (0.03)       | 2.88 (0.03)       | 2.86E-29                                        | 1.16E-09                                        | 7.40E-32                                        | 33.73                                 | 8.51                                  | 45.11                                 |
| Angular_L              | 2.20 (0.03)       | 3.02 (0.03)       | 3.24 (0.03)       | 5.73E-35                                        | 7.32E-10                                        | 3.16E-36                                        | 37.43                                 | 7.29                                  | 47.44                                 |
| Angular_R              | 2.13 (0.03)       | 2.82 (0.03)       | 3.10 (0.03)       | 1.54E-30                                        | 1.48E-13                                        | 3.75E-34                                        | 32.08                                 | 10.25                                 | 45.62                                 |
| SupraMarginal_L        | 2.23 (0.03)       | 3.15 (0.03)       | 3.34 (0.03)       | 4.37E-36                                        | 2.56E-07                                        | 2.09E-36                                        | 41.29                                 | 5.91                                  | 49.64                                 |
| SupraMarginal_R        | 2.12 (0.03)       | 2.96 (0.03)       | 3.13 (0.03)       | 1.49E-37                                        | 2.30E-08                                        | 2.37E-37                                        | 39.19                                 | 5.93                                  | 47.44                                 |
| Precuneus_L            | 2.10 (0.03)       | 2.75 (0.03)       | 2.87 (0.03)       | 2.11E-30                                        | 2.17E-04                                        | 2.87E-29                                        | 30.98                                 | 4.14                                  | 36.40                                 |
| Precuneus_R            | 1.91 (0.03)       | 2.77 (0.03)       | 2.86 (0.03)       | 1.90E-32                                        | 6.54E-03                                        | 2.44E-31                                        | 44.77                                 | 3.54                                  | 49.89                                 |
|                        |                   |                   |                   |                                                 |                                                 | Average % Change                                | 31.59                                 | 9.22                                  | 43.16                                 |
| <b>Occipital Lobe</b>  |                   |                   |                   |                                                 |                                                 |                                                 |                                       |                                       |                                       |
| Occipital_Sup_L        | 2.02 (0.03)       | 2.35 (0.03)       | 2.60 (0.03)       | 8.05E-17                                        | 1.47E-12                                        | 3.36E-23                                        | 16.15                                 | 10.71                                 | 28.59                                 |
| Occipital_Sup_R        | 2.02 (0.03)       | 2.25 (0.03)       | 2.49 (0.03)       | 1.72E-09                                        | 1.72E-10                                        | 1.55E-17                                        | 11.30                                 | 11.00                                 | 23.54                                 |
| Occipital_Mid_L        | 2.04 (0.02)       | 2.49 (0.02)       | 2.69 (0.02)       | 4.16E-29                                        | 3.94E-13                                        | 1.41E-32                                        | 22.21                                 | 7.95                                  | 31.93                                 |
| Occipital_Mid_R        | 1.98 (0.02)       | 2.34 (0.02)       | 2.57 (0.02)       | 1.01E-20                                        | 6.45E-13                                        | 7.27E-27                                        | 17.99                                 | 9.77                                  | 29.52                                 |
| Occipital_Inf_L        | 2.19 (0.03)       | 2.43 (0.03)       | 2.67 (0.03)       | 1.13E-09                                        | 1.03E-09                                        | 2.11E-17                                        | 10.96                                 | 9.91                                  | 21.96                                 |
| Occipital_Inf_R        | 2.18 (0.05)       | 2.16 (0.05)       | 2.38 (0.05)       | 5.44E-01                                        | 1.23E-06                                        | 3.13E-04                                        | -1.18                                 | 10.61                                 | 9.30                                  |
| Cuneus_L               | 2.02 (0.04)       | 2.49 (0.04)       | 2.62 (0.04)       | 3.29E-16                                        | 3.69E-03                                        | 4.81E-18                                        | 23.79                                 | 5.17                                  | 30.19                                 |
| Cuneus_R               | 2.13 (0.03)       | 2.59 (0.03)       | 2.70 (0.03)       | 2.41E-18                                        | 4.42E-03                                        | 2.35E-20                                        | 21.48                                 | 4.14                                  | 26.51                                 |
| Calcarine_L            | 2.04 (0.04)       | 2.24 (0.04)       | 2.45 (0.04)       | 1.91E-05                                        | 4.87E-06                                        | 7.51E-11                                        | 9.52                                  | 9.40                                  | 19.81                                 |
| Calcarine_R            | 2.20 (0.04)       | 2.21 (0.04)       | 2.44 (0.04)       | 8.01E-01                                        | 1.41E-07                                        | 6.80E-06                                        | 0.45                                  | 10.52                                 | 11.02                                 |
| Lingual_L              | 2.17 (0.03)       | 2.08 (0.03)       | 2.39 (0.03)       | 8.12E-04                                        | 1.20E-16                                        | 4.27E-08                                        | -4.47                                 | 15.28                                 | 10.12                                 |
| Lingual_R              | 2.18 (0.03)       | 2.03 (0.03)       | 2.39 (0.03)       | 8.50E-04                                        | 2.99E-11                                        | 3.48E-05                                        | -6.97                                 | 17.43                                 | 9.24                                  |
| Fusiform_L             | 2.21 (0.03)       | 2.15 (0.03)       | 2.54 (0.03)       | 1.08E-01                                        | 5.38E-17                                        | 4.62E-12                                        | -2.42                                 | 17.89                                 | 15.03                                 |
| Fusiform_R             | 2.29 (0.02)       | 2.20 (0.02)       | 2.64 (0.02)       | 1.90E-03                                        | 1.85E-22                                        | 2.36E-16                                        | -3.91                                 | 19.57                                 | 14.89                                 |
|                        |                   |                   |                   |                                                 |                                                 | Average % Change                                | 8.21                                  | 11.38                                 | 20.12                                 |
