# Supplementary material
Source: PubMed Central journal article supplement (PMC4506327)
Supplement: supp_bhu027_bhu027supp_table4.pdf [file supp_bhu027_bhu027supp_table4.pdf]

**Table S3. Singleton Surface Area**

| ROI                    | LS Means - Year 0 |                   |                   | Difference in LS               |                                |                                | Difference in LS                      |                                       |                                       | Difference in LS |  |  |
|------------------------|-------------------|-------------------|-------------------|--------------------------------|--------------------------------|--------------------------------|---------------------------------------|---------------------------------------|---------------------------------------|------------------|--|--|
|                        | LS Means - Year 0 | LS Means - Year 1 | LS Means - Year 2 | Means for Years 0 to 1 P-Value | Means for Years 1 to 2 P-Value | Means for Years 0 to 2 P-Value | Percent Change LS Means - Year 0 to 1 | Percent Change LS Means - Year 1 to 2 | Percent Change LS Means - Year 0 to 2 |                  |  |  |
| <b>Central Region</b>  |                   |                   |                   |                                |                                |                                |                                       |                                       |                                       |                  |  |  |
| Precentral_L           | 1462.57 (40.17)   | 2628.19 (40.17)   | 3045.36 (40.17)   | 4.31E-42                       | 9.71E-16                       | 8.31E-46                       | 79.70                                 | 15.87                                 | 108.22                                |                  |  |  |
| Precentral_R           | 1546.12 (62.61)   | 2804.53 (62.61)   | 3284.73 (62.61)   | 1.32E-32                       | 2.69E-11                       | 3.78E-36                       | 81.39                                 | 17.12                                 | 112.45                                |                  |  |  |
| Postcentral_L          | 1318.75 (51.93)   | 2458.85 (51.93)   | 3048.90 (51.93)   | 2.80E-33                       | 5.24E-12                       | 9.20E-37                       | 83.22                                 | 17.73                                 | 115.70                                |                  |  |  |
| Postcentral_R          | 1589.68 (64.14)   | 2916.43 (64.14)   | 3644.80 (64.14)   | 1.44E-27                       | 1.77E-10                       | 1.42E-31                       | 78.76                                 | 19.13                                 | 112.96                                |                  |  |  |
| Rolandic_Oper_L        | 476.91 (17.79)    | 714.27 (17.79)    | 909.62 (17.79)    | 5.46E-41                       | 9.79E-16                       | 7.68E-43                       | 76.90                                 | 16.14                                 | 105.45                                |                  |  |  |
| Rolandic_Oper_R        | 580.24 (22.71)    | 796.12 (22.71)    | 1028.81 (22.71)   | 7.69E-44                       | 6.19E-19                       | 1.94E-45                       | 77.58                                 | 17.27                                 | 108.24                                |                  |  |  |
|                        |                   |                   |                   |                                |                                |                                | Average % Change                      | 79.59                                 | 17.21                                 | 110.50           |  |  |
| <b>Frontal Lobe</b>    |                   |                   |                   |                                |                                |                                |                                       |                                       |                                       |                  |  |  |
| <i>Lateral Surface</i> |                   |                   |                   |                                |                                |                                |                                       |                                       |                                       |                  |  |  |
| Frontal_Sup_L          | 2222.73 (76.32)   | 3991.60 (76.32)   | 5143.45 (76.32)   | 2.68E-39                       | 1.37E-21                       | 1.15E-44                       | 86.45                                 | 24.00                                 | 131.20                                |                  |  |  |
| Frontal_Sup_R          | 2168.97 (89.76)   | 3846.70 (89.76)   | 5123.49 (89.76)   | 1.58E-31                       | 5.39E-17                       | 4.36E-39                       | 83.46                                 | 24.97                                 | 129.28                                |                  |  |  |
| Frontal_Mid_L          | 368.75 (23.10)    | 705.61 (23.10)    | 893.94 (23.10)    | 1.35E-44                       | 5.23E-32                       | 5.67E-52                       | 79.58                                 | 28.86                                 | 131.40                                |                  |  |  |
| Frontal_Mid_R          | 490.36 (35.41)    | 850.51 (35.41)    | 1136.55 (35.41)   | 9.76E-30                       | 9.28E-23                       | 1.50E-40                       | 77.35                                 | 33.19                                 | 136.22                                |                  |  |  |
| Frontal_Inf_Oper_L     | 364.77 (20.75)    | 667.46 (20.75)    | 843.03 (20.75)    | 7.12E-28                       | 1.98E-15                       | 7.80E-34                       | 82.98                                 | 26.30                                 | 131.11                                |                  |  |  |
| Frontal_Inf_Oper_R     | 646.65 (37.77)    | 1208.74 (37.77)   | 1481.68 (37.77)   | 4.01E-35                       | 4.32E-17                       | 2.09E-38                       | 86.92                                 | 22.58                                 | 129.13                                |                  |  |  |
| Frontal_Inf_Tri_L      | 1269.29 (47.46)   | 2468.73 (47.46)   | 2868.99 (47.46)   | 6.42E-48                       | 3.74E-18                       | 1.49E-48                       | 94.50                                 | 16.21                                 | 126.03                                |                  |  |  |
| Frontal_Inf_Tri_R      | 918.48 (43.63)    | 1718.59 (43.63)   | 2069.77 (43.63)   | 1.64E-27                       | 1.33E-10                       | 5.43E-33                       | 87.11                                 | 20.43                                 | 125.35                                |                  |  |  |
|                        |                   |                   |                   |                                |                                |                                | Average % Change                      | 84.79                                 | 24.57                                 | 129.96           |  |  |
| <i>Medial Surface</i>  |                   |                   |                   |                                |                                |                                |                                       |                                       |                                       |                  |  |  |
| Frontal_Sup_Medial_L   | 856.41 (34.12)    | 1489.18 (34.12)   | 1827.67 (34.12)   | 1.31E-22                       | 4.63E-19                       | 6.35E-34                       | 68.39                                 | 34.75                                 | 126.90                                |                  |  |  |
| Frontal_Sup_Medial_R   | 893.09 (42.68)    | 1535.50 (42.68)   | 1872.89 (42.68)   | 6.33E-27                       | 1.92E-20                       | 4.14E-35                       | 67.03                                 | 30.74                                 | 118.38                                |                  |  |  |
| Supp_Motor_Area_L      | 590.35 (20.96)    | 1044.35 (20.96)   | 1212.87 (20.96)   | 1.90E-37                       | 2.62E-18                       | 3.21E-41                       | 70.98                                 | 19.73                                 | 104.72                                |                  |  |  |
| Supp_Motor_Area_R      | 762.00 (29.15)    | 1353.15 (29.15)   | 1586.82 (29.15)   | 1.51E-45                       | 2.60E-23                       | 3.38E-48                       | 76.59                                 | 19.63                                 | 111.25                                |                  |  |  |
| Paracentral_Lobule_L   | 1052.46 (40.43)   | 1799.48 (40.43)   | 2154.58 (40.43)   | 1.62E-35                       | 3.28E-08                       | 3.58E-35                       | 75.38                                 | 11.71                                 | 96.25                                 |                  |  |  |
| Paracentral_Lobule_R   | 898.92 (33.79)    | 1587.43 (33.79)   | 1898.98 (33.79)   | 2.60E-32                       | 1.39E-07                       | 1.58E-31                       | 102.32                                | 14.53                                 | 131.72                                |                  |  |  |
|                        |                   |                   |                   |                                |                                |                                | Average % Change                      | 76.83                                 | 21.85                                 | 114.87           |  |  |
| <i>Orbital Surface</i> |                   |                   |                   |                                |                                |                                |                                       |                                       |                                       |                  |  |  |
| Frontal_Sup_Orb_L      | 182.90 (12.56)    | 301.93 (12.56)    | 350.45 (12.56)    | 4.22E-16                       | 1.27E-12                       | 1.19E-28                       | 49.77                                 | 27.35                                 | 90.73                                 |                  |  |  |
| Frontal_Sup_Orb_R      | 210.39 (14.57)    | 349.30 (14.57)    | 381.84 (14.57)    | 2.35E-09                       | 2.39E-10                       | 4.65E-23                       | 37.21                                 | 29.23                                 | 77.31                                 |                  |  |  |
| Frontal_Med_Orb_L      | 1143.68 (55.33)   | 1925.83 (55.33)   | 2595.03 (55.33)   | 4.67E-14                       | 5.37E-10                       | 6.94E-25                       | 61.41                                 | 29.29                                 | 108.70                                |                  |  |  |
| Frontal_Med_Orb_R      | 822.61 (45.79)    | 1374.04 (45.79)   | 1796.41 (45.79)   | 1.80E-22                       | 7.46E-11                       | 4.43E-30                       | 66.45                                 | 21.82                                 | 102.76                                |                  |  |  |
| Frontal_Mid_Orb_L      | 372.14 (19.28)    | 600.67 (19.28)    | 776.63 (19.28)    | 5.95E-21                       | 2.95E-10                       | 2.35E-28                       | 91.35                                 | 26.69                                 | 142.42                                |                  |  |  |
| Frontal_Mid_Orb_R      | 453.85 (19.10)    | 755.41 (19.10)    | 920.21 (19.10)    | 1.83E-13                       | 5.91E-10                       | 1.21E-22                       | 73.45                                 | 33.63                                 | 131.78                                |                  |  |  |
| Frontal_Inf_Orb_L      | 313.16 (25.84)    | 361.57 (25.84)    | 515.29 (25.84)    | 8.08E-25                       | 5.59E-12                       | 1.58E-33                       | 73.89                                 | 22.73                                 | 113.41                                |                  |  |  |
| Frontal_Inf_Orb_R      | 325.26 (27.83)    | 389.49 (27.83)    | 585.60 (27.83)    | 1.08E-21                       | 7.57E-10                       | 1.27E-28                       | 71.93                                 | 21.97                                 | 109.71                                |                  |  |  |
| Rectus_L               | 1161.18 (40.78)   | 1923.35 (40.78)   | 2152.82 (40.78)   | 2.69E-02                       | 4.29E-10                       | 1.72E-10                       | 15.46                                 | 42.51                                 | 64.55                                 |                  |  |  |
| Rectus_R               | 1194.80 (40.31)   | 1856.97 (40.31)   | 2096.60 (40.31)   | 2.01E-02                       | 2.94E-10                       | 2.05E-11                       | 19.75                                 | 50.35                                 | 80.04                                 |                  |  |  |
| Olfactory_L            | 747.99 (37.42)    | 1287.74 (37.42)   | 1596.14 (37.42)   | 4.14E-12                       | 1.26E-03                       | 9.39E-16                       | 65.08                                 | 16.07                                 | 91.61                                 |                  |  |  |
| Olfactory_R            | 731.25 (27.34)    | 1266.32 (27.34)   | 1589.59 (27.34)   | 1.24E-15                       | 2.09E-02                       | 1.27E-15                       | 66.02                                 | 9.32                                  | 81.49                                 |                  |  |  |
|                        |                   |                   |                   |                                |                                |                                | Average % Change                      | 57.65                                 | 27.58                                 | 99.54            |  |  |
| <b>Temporal Lobe</b>   |                   |                   |                   |                                |                                |                                |                                       |                                       |                                       |                  |  |  |
| Temporal_Sup_L         | 1109.90 (38.59)   | 1932.49 (38.59)   | 2341.66 (38.59)   | 1.16E-37                       | 1.58E-14                       | 2.31E-40                       | 91.54                                 | 18.60                                 | 127.16                                |                  |  |  |
| Temporal_Sup_R         | 1211.83 (43.17)   | 2132.54 (43.17)   | 2572.25 (43.17)   | 1.80E-39                       | 5.11E-08                       | 6.91E-38                       | 96.01                                 | 11.43                                 | 118.42                                |                  |  |  |
| Heschl_L               | 193.60 (17.63)    | 343.99 (17.63)    | 425.07 (17.63)    | 1.30E-28                       | 6.20E-09                       | 1.68E-30                       | 102.56                                | 18.77                                 | 140.59                                |                  |  |  |
| Heschl_R               | 131.94 (9.97)     | 227.78 (9.97)     | 290.41 (9.97)     | 5.24E-19                       | 1.12E-03                       | 1.32E-19                       | 92.47                                 | 13.70                                 | 118.83                                |                  |  |  |
| Temporal_Mid_L         | 1462.36 (64.04)   | 2699.62 (64.04)   | 3004.37 (64.04)   | 9.59E-38                       | 3.47E-14                       | 2.50E-41                       | 85.61                                 | 17.56                                 | 118.20                                |                  |  |  |
| Temporal_Mid_R         | 1278.61 (47.02)   | 2168.02 (47.02)   | 2472.55 (47.02)   | 1.76E-39                       | 5.67E-12                       | 3.21E-41                       | 87.03                                 | 14.63                                 | 114.39                                |                  |  |  |
| Temporal_Inf_L         | 1162.97 (54.65)   | 2342.18 (54.65)   | 2672.54 (54.65)   | 5.99E-31                       | 6.19E-18                       | 1.33E-39                       | 88.29                                 | 27.52                                 | 140.12                                |                  |  |  |
| Temporal_Inf_R         | 975.83 (45.78)    | 1940.30 (45.78)   | 2258.22 (45.78)   | 4.29E-40                       | 3.50E-21                       | 2.30E-45                       | 80.90                                 | 22.14                                 | 120.95                                |                  |  |  |
| Temporal_Pole_Sup_L    | 1345.63 (56.20)   | 2256.17 (56.20)   | 2561.53 (56.20)   | 1.33E-09                       | 1.09E-21                       | 2.65E-26                       | 28.15                                 | 42.60                                 | 82.73                                 |                  |  |  |
| Temporal_Pole_Sup_R    | 1244.19 (54.73)   | 2128.29 (54.73)   | 2435.25 (54.73)   | 1.39E-06                       | 1.72E-18                       | 1.67E-21                       | 24.54                                 | 43.62                                 | 78.86                                 |                  |  |  |
| Temporal_Pole_Mid_L    | 679.07 (40.96)    | 1437.88 (40.96)   | 1547.36 (40.96)   | 5.31E-04                       | 2.22E-19                       | 8.48E-20                       | 24.96                                 | 66.73                                 | 108.35                                |                  |  |  |
| Temporal_Pole_Mid_R    | 674.90 (42.83)    | 1488.15 (42.83)   | 1684.33 (42.83)   | 1.31E-09                       | 1.34E-19                       | 3.37E-25                       | 41.47                                 | 51.81                                 | 114.77                                |                  |  |  |
|                        |                   |                   |                   |                                |                                |                                | Average % Change                      | 70.29                                 | 29.09                                 | 115.28           |  |  |
| <b>Insula</b>          |                   |                   |                   |                                |                                |                                |                                       |                                       |                                       |                  |  |  |
| Insula_L               | 1988.88 (76.84)   | 3836.54 (76.84)   | 4311.37 (76.84)   | 4.21E-39                       | 4.02E-11                       | 6.44E-39                       | 65.64                                 | 11.93                                 | 85.40                                 |                  |  |  |
| Insula_R               | 1432.93 (57.10)   | 2746.73 (57.10)   | 3066.65 (57.10)   | 1.08E-36                       | 1.05E-12                       | 1.25E-37                       | 55.42                                 | 12.90                                 | 75.48                                 |                  |  |  |
|                        |                   |                   |                   |                                |                                |                                | Average % Change                      | 60.53                                 | 12.42                                 | 80.44            |  |  |
| <b>Cingulate</b>       |                   |                   |                   |                                |                                |                                |                                       |                                       |                                       |                  |  |  |
| Cingulate_Ant_L        | 530.40 (28.61)    | 983.18 (28.61)    | 1119.56 (28.61)   | 5.97E-23                       | 8.09E-12                       | 9.07E-30                       | 72.16                                 | 23.95                                 | 113.39                                |                  |  |  |
| Cingulate_Ant_R        | 582.62 (33.81)    | 1139.20 (33.81)   | 1284.70 (33.81)   | 2.22E-35                       | 4.49E-22                       | 2.05E-42                       | 73.17                                 | 25.53                                 | 117.38                                |                  |  |  |
| Cingulate_Mid_L        | 1429.83 (62.45)   | 2358.97 (62.45)   | 3063.44 (62.45)   | 4.74E-29                       | 1.84E-13                       | 4.20E-37                       | 74.11                                 | 21.17                                 | 110.98                                |                  |  |  |
| Cingulate_Mid_R        | 1541.30 (60.89)   | 2402.91 (60.89)   | 3035.40 (60.89)   | 1.81E-30                       | 1.16E-13                       | 1.86E-37                       | 75.98                                 | 20.62                                 | 112.26                                |                  |  |  |
| Cingulate_Post_L       | 1883.80 (78.33)   | 3451.48 (78.33)   | 4063.34 (78.33)   | 9.37E-17                       | 1.78E-07                       | 1.48E-20                       | 77.69                                 | 23.57                                 | 119.57                                |                  |  |  |
| Cingulate_Post_R       | 2026.92 (99.68)   | 3623.41 (99.68)   | 4316.58 (99.68)   | 9.45E-17                       | 1.02E-09                       | 7.17E-23                       | 72.64                                 | 27.49                                 | 120.11                                |                  |  |  |
|                        |                   |                   |                   |                                |                                |                                | Average % Change                      | 74.29                                 | 23.72                                 | 115.61           |  |  |
| <b>Parietal Lobe</b>   |                   |                   |                   |                                |                                |                                |                                       |                                       |                                       |                  |  |  |
| Parietal_Sup_L         | 787.66 (46.37)    | 1598.82 (46.37)   | 1894.72 (46.37)   | 1.67E-28                       | 1.09E-08                       | 1.19E-31                       | 102.98                                | 18.51                                 | 140.55                                |                  |  |  |
| Parietal_Sup_R         | 910.39 (54.41)    | 1840.54 (54.41)   | 2259.21 (54.41)   | 3.16E-26                       | 2.92E-10                       | 1.39E-31                       | 102.17                                | 22.75                                 | 148.16                                |                  |  |  |
| Parietal_Inf_L         | 1426.43 (73.33)   | 2491.41 (73.33)   | 3173.40 (73.33)   | 8.03E-27                       | 1.46E-16                       | 5.31E-34                       | 74.66                                 | 27.37                                 | 122.47                                |                  |  |  |
| Parietal_Inf_R         | 1012.46 (55.06)   | 1784.64 (55.06)   | 2220.33 (55.06)   | 2.81E-22                       | 3.35E-11                       | 6.91E-29                       | 76.27                                 | 24.41                                 | 119.30                                |                  |  |  |
| Angular_L              | 588.14 (38.84)    | 1083.47 (38.84)   | 1299.38 (38.84)   | 2.96E-25                       | 2.10E-12                       | 1.45E-29                       | 87.72                                 | 25.23                                 | 135.08                                |                  |  |  |
| Angular_R              | 1183.09 (59.37)   | 2182.97 (59.37)   | 2529.53 (59.37)   | 6.71E-24                       | 4.23E-11                       | 2.29E-30                       | 89.92                                 | 24.80                                 | 137.03                                |                  |  |  |
| SupraMarginal_L        | 929.28 (70.81)    | 1744.43 (70.81)   | 2184.59 (70.81)   | 4.26E-26                       | 9.22E-10                       | 6.43E-29                       | 84.22                                 | 19.93                                 | 120.93                                |                  |  |  |
| SupraMarginal_R        | 1303.64 (75.45)   | 2475.88 (75.45)   | 3089.99 (75.45)   | 3.34E-27                       | 1.43E-07                       | 4.87E-30                       | 84.51                                 | 15.88                                 | 113.81                                |                  |  |  |
| Precuneus_L            | 2372.43 (68.61)   | 4431.25 (68.61)   | 5328.09 (68.61)   | 5.01E-43                       | 1.73E-20                       | 1.63E-48                       | 86.78                                 | 20.24                                 | 124.58                                |                  |  |  |
| Precuneus_R            | 1678.91 (57.53)   | 3063.40 (57.53)   | 3749.30 (57.53)   | 8.37E-40                       | 5.64E-21                       | 2.53E-45                       | 82.46                                 | 22.39                                 | 123.32                                |                  |  |  |
|                        |                   |                   |                   |                                |                                |                                | Average % Change                      | 87.17                                 | 22.15                                 | 128.52           |  |  |
| <b>Occipital Lobe</b>  |                   |                   |                   |                                |                                |                                |                                       |                                       |                                       |                  |  |  |
| Occipital_Sup_L        | 542.66 (22.63)    | 953.33 (22.63)    | 1064.97 (22.63)   | 1.40E-31                       | 5.76E-03                       | 1.91E-29                       | 111.74                                | 7.61                                  | 127.86                                |                  |  |  |
| Occipital_Sup_R        | 243.22 (18.16)    | 492.08 (18.16)    | 563.58 (18.16)    | 1.18E-35                       | 5.16E-07                       | 7.37E-35                       | 120.50                                | 13.18                                 | 149.57                                |                  |  |  |
| Occipital_Mid_L        | 112.77 (7.90)     | 228.44 (7.90)     | 271.33 (7.90)     | 7.20E-38                       | 1.71E-08                       | 1.04E-38                       | 92.90                                 | 12.38                                 | 116.77                                |                  |  |  |
| Occipital_Mid_R        | 73.85 (6.33)      | 142.13 (6.33)     | 161.60 (6.33)     | 8.26E-39                       | 3.05E-08                       | 1.17E-38                       | 91.69                                 | 11.65                                 | 114.01                                |                  |  |  |
| Occipital_Inf_L        | 1437.87 (62.93)   | 2754.03 (62.93)   | 3266.23 (62.93)   | 1.21E-24                       | 1.93E-05                       | 7.70E-27                       | 85.37                                 | 13.87                                 | 111.08                                |                  |  |  |
| Occipital_Inf_R        | 1615.34 (79.13)   | 3166.19 (79.13)   | 3528.15 (79.13)   | 2.62E-30                       | 4.98E-06                       | 2.68E-30                       | 95.53                                 | 12.77                                 | 120.50                                |                  |  |  |
| Cuneus_L               | 492.51 (22.50)    | 631.13 (22.50)    | 899.97 (22.50)    | 1.13E-38                       | 6.58E-10                       | 6.24E-39                       | 101.40                                | 14.10                                 | 129.80                                |                  |  |  |
| Cuneus_R               | 528.50 (28.82)    | 658.18 (28.82)    | 945.27 (28.82)    | 7.37E-37                       | 2.47E-11                       | 1.67E-38                       | 98.84                                 | 16.39                                 | 131.41                                |                  |  |  |
| Calcarine_L            | 2795.00 (100.46)  | 5187.80 (100.46)  | 6098.81 (100.46)  | 4.81E-34                       | 1.11E-06                       | 6.99E-34                       | 84.61                                 | 11.29                                 | 105.45                                |                  |  |  |
| Calcarine_R            | 3059.69 (110.02)  | 5722.55 (110.02)  | 6559.80 (110.02)  | 7.04E-33                       | 6.63E-10                       | 5.57E-35                       | 69.56                                 | 14.05                                 | 93.38                                 |                  |  |  |
| Lingual_L              | 231.82 (19.07)    | 289.68 (19.07)    | 482.98 (19.07)    | 1.17E-21                       | 2.54E-05                       | 3.68E-26                       | 67.67                                 | 13.53                                 | 90.36                                 |                  |  |  |
| Lingual_R              | 356.44 (22.63)    | 504.26 (22.63)    | 765.54 (22.63)    | 1.01E-22                       | 6.23E-06                       | 7.32E-27                       | 71.06                                 | 14.42                                 | 95.73                                 |                  |  |  |
| Fusiform_L             | 1508.97 (63.57)   | 2841.27 (63.57)   | 3623.30 (63.57)   | 5.64E-18                       | 8.41E-13                       | 1.66E-30                       | 64.98                                 | 29.86                                 | 114.25                                |                  |  |  |
| Fusiform_R             | 2226.87 (76.40)   | 4028.44 (76.40)   | 4920.29 (76.40)   | 1.05E-20                       | 2.12E-14                       | 1.08E-30                       | 55.90                                 | 26.32                                 | 96.94                                 |                  |  |  |
