# Supplementary material
Source: PubMed Central journal article supplement (PMC4506327)
Supplement: supp_bhu027_bhu027supp_table5.pdf [file supp_bhu027_bhu027supp_table5.pdf]

Table SS. Twin Surface Area

| ROI                   | LS Means               |                  |                  | Difference in LS Means   |                          |                          | Percent Change LS   |                     |                     |
|-----------------------|------------------------|------------------|------------------|--------------------------|--------------------------|--------------------------|---------------------|---------------------|---------------------|
|                       | Year 0                 | Year 1           | Year 2           | for Years 0 to 1 P-Value | for Years 1 to 2 P-Value | for Years 0 to 2 P-Value | Means - Year 0 to 1 | Means - Year 1 to 2 | Means - Year 0 to 2 |
| <b>Central Region</b> |                        |                  |                  |                          |                          |                          |                     |                     |                     |
| Precentral_L          | 1418.97 (58.72)        | 2777.31 (58.72)  | 3210.76 (58.72)  | 2.40E-40                 | 7.87E-16                 | 3.99E-40                 | 95.73               | 15.61               | 126.27              |
| Precentral_R          | 1483.53 (65.43)        | 2885.18 (65.43)  | 3343.51 (65.43)  | 3.48E-36                 | 2.24E-13                 | 1.94E-36                 | 94.48               | 15.89               | 125.38              |
| Postcentral_L         | 1886.19 (63.85)        | 3716.85 (63.85)  | 4245.15 (63.85)  | 2.72E-40                 | 4.00E-14                 | 2.25E-40                 | 97.06               | 14.21               | 125.07              |
| Postcentral_R         | 2058.79 (70.60)        | 3891.37 (70.60)  | 4522.72 (70.60)  | 4.03E-37                 | 7.60E-15                 | 2.18E-38                 | 89.01               | 16.22               | 119.68              |
| Rolandic_Oper_L       | 540.63 (22.08)         | 1003.88 (22.08)  | 1134.00 (22.08)  | 7.86E-35                 | 2.11E-10                 | 2.12E-34                 | 85.69               | 12.96               | 109.76              |
| Rolandic_Oper_R       | 673.40 (27.52)         | 1261.87 (27.52)  | 1471.07 (27.52)  | 3.70E-36                 | 1.08E-14                 | 6.52E-37                 | 87.39               | 16.58               | 118.45              |
|                       |                        |                  |                  |                          |                          | Average % Change         | 91.56               | 15.25               | 120.77              |
| <b>Frontal Lobe</b>   |                        |                  |                  |                          |                          |                          |                     |                     |                     |
|                       | <i>Lateral Surface</i> |                  |                  |                          |                          |                          |                     |                     |                     |
| Frontal_Sup_L         | 1153.65 (45.12)        | 2402.66 (45.12)  | 2841.93 (45.12)  | 5.87E-44                 | 2.26E-20                 | 2.00E-44                 | 108.27              | 18.28               | 146.34              |
| Frontal_Sup_R         | 1456.44 (70.93)        | 2899.01 (70.93)  | 3484.39 (70.93)  | 1.92E-36                 | 3.55E-17                 | 7.63E-38                 | 99.05               | 20.19               | 139.24              |
| Frontal_Mid_L         | 2112.32 (104.66)       | 4217.95 (104.66) | 5293.07 (104.66) | 2.58E-39                 | 4.87E-24                 | 4.36E-42                 | 99.68               | 25.49               | 150.58              |
| Frontal_Mid_R         | 2147.57 (116.82)       | 4192.05 (116.82) | 5310.87 (116.82) | 8.58E-33                 | 7.62E-20                 | 1.99E-36                 | 95.20               | 26.69               | 147.30              |
| Frontal_Inf_Oper_L    | 367.38 (23.88)         | 701.17 (23.88)   | 839.13 (23.88)   | 1.28E-31                 | 5.69E-14                 | 1.18E-32                 | 90.86               | 19.67               | 128.41              |
| Frontal_Inf_Oper_R    | 621.38 (31.57)         | 1238.96 (31.57)  | 1478.60 (31.57)  | 1.08E-34                 | 4.15E-15                 | 6.69E-36                 | 99.39               | 19.34               | 137.95              |
| Frontal_Inf_Tri_L     | 1178.07 (61.11)        | 2469.27 (61.11)  | 2871.49 (61.11)  | 7.82E-39                 | 2.25E-14                 | 2.15E-38                 | 109.60              | 16.29               | 143.75              |
| Frontal_Inf_Tri_R     | 873.32 (41.49)         | 1787.23 (41.49)  | 2081.66 (41.49)  | 3.35E-37                 | 8.13E-14                 | 2.58E-37                 | 104.65              | 16.47               | 138.36              |
|                       |                        |                  |                  |                          |                          | Average % Change         | 100.84              | 20.30               | 141.49              |
|                       | <i>Medial Surface</i>  |                  |                  |                          |                          |                          |                     |                     |                     |
| Frontal_Sup_Medial_L  | 981.80 (41.36)         | 1714.49 (41.36)  | 2220.07 (41.36)  | 1.17E-32                 | 2.00E-24                 | 1.89E-38                 | 74.63               | 29.49               | 126.12              |
| Frontal_Sup_Medial_R  | 721.65 (32.31)         | 1251.39 (32.31)  | 1592.78 (32.31)  | 1.32E-33                 | 7.50E-24                 | 2.05E-38                 | 73.41               | 27.28               | 120.71              |
| Supp_Motor_Area_L     | 882.18 (33.29)         | 1628.10 (33.29)  | 1985.70 (33.29)  | 7.00E-39                 | 2.33E-22                 | 1.65E-41                 | 84.55               | 21.96               | 125.09              |
| Supp_Motor_Area_R     | 814.22 (40.44)         | 1505.20 (40.44)  | 1851.42 (40.44)  | 7.60E-35                 | 7.60E-20                 | 1.78E-37                 | 84.86               | 23.00               | 127.38              |
| Paracentral_Lobule_L  | 533.33 (41.41)         | 983.84 (41.41)   | 1087.35 (41.41)  | 2.98E-33                 | 2.23E-07                 | 5.37E-31                 | 84.47               | 10.52               | 103.88              |
| Paracentral_Lobule_R  | 228.95 (21.05)         | 466.21 (21.05)   | 530.83 (21.05)   | 1.28E-22                 | 6.82E-05                 | 7.02E-22                 | 103.63              | 13.86               | 131.86              |
|                       |                        |                  |                  |                          |                          | Average % Change         | 84.26               | 21.02               | 122.51              |
|                       | <i>Orbital Surface</i> |                  |                  |                          |                          |                          |                     |                     |                     |
| Frontal_Sup_Orb_L     | 437.95 (19.83)         | 764.06 (19.83)   | 881.00 (19.83)   | 2.50E-24                 | 8.22E-08                 | 2.61E-26                 | 74.46               | 15.30               | 101.16              |
| Frontal_Sup_Orb_R     | 514.62 (16.97)         | 810.72 (16.97)   | 928.80 (16.97)   | 2.19E-26                 | 4.08E-10                 | 7.75E-29                 | 57.54               | 14.57               | 80.48               |
| Frontal_Med_Orb_L     | 353.90 (16.52)         | 627.57 (16.52)   | 812.37 (16.52)   | 6.19E-26                 | 4.98E-18                 | 2.89E-32                 | 77.33               | 29.45               | 129.55              |
| Frontal_Med_Orb_R     | 404.04 (20.62)         | 775.39 (20.62)   | 924.87 (20.62)   | 3.00E-30                 | 1.22E-12                 | 4.32E-32                 | 91.91               | 19.28               | 128.91              |
| Frontal_Mid_Orb_L     | 353.18 (18.15)         | 740.51 (18.15)   | 901.36 (18.15)   | 6.55E-37                 | 5.90E-18                 | 1.43E-38                 | 109.67              | 21.72               | 155.22              |
| Frontal_Mid_Orb_R     | 479.07 (29.07)         | 988.94 (29.07)   | 1165.23 (29.07)  | 1.43E-32                 | 6.63E-12                 | 5.48E-33                 | 106.43              | 17.83               | 143.23              |
| Frontal_Inf_Orb_L     | 768.20 (30.63)         | 1412.01 (30.63)  | 1660.25 (30.63)  | 5.29E-35                 | 3.18E-15                 | 2.15E-36                 | 83.81               | 17.58               | 116.12              |
| Frontal_Inf_Orb_R     | 831.27 (41.81)         | 1532.40 (41.81)  | 1786.42 (41.81)  | 3.88E-32                 | 2.58E-12                 | 1.51E-33                 | 84.34               | 16.58               | 114.90              |
| Rectus_L              | 291.51 (9.16)          | 302.62 (9.16)    | 442.31 (9.16)    | 5.45E-01                 | 1.91E-10                 | 9.87E-09                 | 46.16               | 45.73               | 51.73               |
| Rectus_R              | 305.17 (21.05)         | 337.58 (21.05)   | 472.96 (21.05)   | 1.29E-01                 | 2.58E-08                 | 1.85E-08                 | 10.62               | 40.10               | 54.99               |
| Olfactory_L           | 190.53 (7.76)          | 344.04 (7.76)    | 350.67 (7.76)    | 3.45E-23                 | 4.87E-01                 | 8.68E-22                 | 80.57               | 1.93                | 84.05               |
| Olfactory_R           | 221.78 (8.12)          | 387.43 (8.12)    | 412.20 (8.12)    | 8.26E-23                 | 2.08E-02                 | 4.58E-24                 | 74.70               | 6.39                | 85.86               |
|                       |                        |                  |                  |                          |                          | Average % Change         | 71.27               | 20.57               | 103.85              |
| <b>Temporal Lobe</b>  |                        |                  |                  |                          |                          |                          |                     |                     |                     |
| Temporal_Sup_L        | 1406.25 (54.68)        | 2806.93 (54.68)  | 3191.18 (54.68)  | 2.21E-40                 | 2.19E-13                 | 1.11E-39                 | 99.60               | 13.69               | 126.93              |
| Temporal_Sup_R        | 1469.82 (53.08)        | 2965.70 (53.08)  | 3339.42 (53.08)  | 3.18E-39                 | 2.59E-11                 | 1.02E-38                 | 101.77              | 12.60               | 127.20              |
| Heschl_L              | 109.07 (9.74)          | 221.96 (9.74)    | 251.20 (9.74)    | 4.20E-23                 | 1.00E-04                 | 3.73E-22                 | 103.50              | 13.17               | 130.31              |
| Heschl_R              | 66.40 (6.78)           | 123.73 (6.78)    | 139.82 (6.78)    | 4.41E-16                 | 2.71E-03                 | 1.02E-15                 | 86.35               | 13.00               | 110.57              |
| Temporal_Mid_L        | 2633.28 (119.72)       | 5401.63 (119.72) | 6348.91 (119.72) | 2.58E-42                 | 1.50E-18                 | 2.79E-42                 | 105.13              | 17.54               | 141.10              |
| Temporal_Mid_R        | 2835.96 (99.77)        | 5740.70 (99.77)  | 6726.87 (99.77)  | 2.35E-40                 | 6.51E-17                 | 1.96E-41                 | 102.43              | 17.17               | 137.18              |
| Temporal_Inf_L        | 1450.48 (53.95)        | 3005.64 (53.95)  | 3644.92 (53.95)  | 4.04E-43                 | 8.19E-23                 | 6.61E-45                 | 107.22              | 21.27               | 151.29              |
| Temporal_Inf_R        | 2158.14 (58.71)        | 4238.47 (58.71)  | 5053.86 (58.71)  | 7.44E-50                 | 1.14E-27                 | 4.49E-51                 | 96.40               | 19.24               | 134.18              |
| Temporal_Pole_Sup_L   | 451.14 (20.92)         | 637.58 (20.92)   | 854.45 (20.92)   | 1.85E-17                 | 2.60E-20                 | 1.41E-27                 | 41.33               | 34.01               | 89.40               |
| Temporal_Pole_Sup_R   | 549.32 (22.61)         | 752.36 (22.61)   | 996.22 (22.61)   | 2.44E-13                 | 2.33E-16                 | 7.17E-24                 | 36.96               | 32.41               | 81.35               |
| Temporal_Pole_Mid_L   | 220.99 (19.15)         | 325.43 (19.15)   | 510.46 (19.15)   | 6.21E-11                 | 1.74E-20                 | 8.33E-24                 | 47.26               | 56.86               | 130.99              |
| Temporal_Pole_Mid_R   | 343.82 (24.29)         | 540.34 (24.29)   | 757.23 (24.29)   | 3.84E-17                 | 5.82E-19                 | 2.48E-26                 | 57.16               | 40.14               | 120.24              |
|                       |                        |                  |                  |                          |                          | Average % Change         | 82.09               | 24.26               | 123.39              |
| <b>Insula</b>         |                        |                  |                  |                          |                          |                          |                     |                     |                     |
| Insula_L              | 1090.57 (29.71)        | 1937.66 (29.71)  | 2090.00 (29.71)  | 3.26E-42                 | 9.25E-09                 | 8.91E-40                 | 77.68               | 7.86                | 91.64               |
| Insula_R              | 1143.70 (26.52)        | 1894.03 (26.52)  | 2086.39 (26.52)  | 1.59E-43                 | 2.26E-14                 | 2.35E-42                 | 65.61               | 10.16               | 82.43               |
|                       |                        |                  |                  |                          |                          | Average % Change         | 71.64               | 9.01                | 87.03               |
| <b>Cingulate</b>      |                        |                  |                  |                          |                          |                          |                     |                     |                     |
| Cingulate_Ant_L       | 760.14 (31.12)         | 1439.50 (31.12)  | 1680.69 (31.12)  | 2.76E-36                 | 9.30E-15                 | 4.32E-37                 | 89.37               | 16.75               | 121.10              |
| Cingulate_Ant_R       | 710.48 (27.08)         | 1304.22 (27.08)  | 1569.73 (27.08)  | 5.41E-34                 | 4.81E-17                 | 8.71E-37                 | 83.57               | 20.36               | 120.94              |
| Cingulate_Mid_L       | 1112.87 (30.31)        | 2025.18 (30.31)  | 2298.25 (30.31)  | 2.97E-41                 | 2.21E-15                 | 1.40E-41                 | 81.98               | 13.48               | 106.52              |
| Cingulate_Mid_R       | 1145.51 (37.46)        | 2141.10 (37.46)  | 2451.50 (37.46)  | 2.80E-39                 | 1.08E-14                 | 1.27E-39                 | 86.91               | 14.50               | 114.01              |
| Cingulate_Post_L      | 187.21 (11.21)         | 322.51 (11.21)   | 380.82 (11.21)   | 2.24E-16                 | 8.20E-06                 | 1.12E-19                 | 72.27               | 18.08               | 103.42              |
| Cingulate_Post_R      | 136.45 (10.95)         | 212.05 (10.95)   | 264.23 (10.95)   | 4.92E-11                 | 7.12E-07                 | 2.66E-15                 | 55.40               | 24.61               | 93.65               |
|                       |                        |                  |                  |                          |                          | Average % Change         | 78.25               | 17.96               | 109.94              |
| <b>Parietal Lobe</b>  |                        |                  |                  |                          |                          |                          |                     |                     |                     |
| Parietal_Sup_L        | 822.63 (43.72)         | 1836.93 (43.72)  | 2060.67 (43.72)  | 7.24E-35                 | 1.17E-07                 | 9.12E-34                 | 123.30              | 12.18               | 150.50              |
| Parietal_Sup_R        | 919.24 (53.60)         | 2063.88 (53.60)  | 2403.96 (53.60)  | 1.53E-33                 | 2.06E-10                 | 9.97E-34                 | 124.52              | 16.48               | 161.51              |
| Parietal_Inf_L        | 1427.09 (55.78)        | 2791.01 (55.78)  | 3434.28 (55.78)  | 5.46E-36                 | 1.28E-19                 | 2.45E-39                 | 95.57               | 23.05               | 140.65              |
| Parietal_Inf_R        | 963.21 (54.66)         | 1909.87 (54.66)  | 2376.14 (54.66)  | 4.38E-29                 | 5.27E-15                 | 2.17E-32                 | 98.28               | 24.41               | 146.69              |
| Angular_L             | 883.26 (55.92)         | 1805.87 (55.92)  | 2240.26 (55.92)  | 5.50E-29                 | 3.40E-14                 | 9.28E-32                 | 104.46              | 24.05               | 153.64              |
| Angular_R             | 1169.01 (60.48)        | 2524.37 (60.48)  | 3109.26 (60.48)  | 1.40E-33                 | 4.18E-16                 | 2.56E-36                 | 115.94              | 23.17               | 165.97              |
| SupraMarginal_L       | 561.83 (31.26)         | 1087.60 (31.26)  | 1320.30 (31.26)  | 6.59E-30                 | 7.30E-14                 | 3.62E-32                 | 93.58               | 21.40               | 135.00              |
| SupraMarginal_R       | 1098.85 (60.05)        | 2190.93 (60.05)  | 2622.60 (60.05)  | 4.72E-31                 | 6.76E-13                 | 1.12E-32                 | 99.38               | 19.70               | 138.67              |
| Precuneus_L           | 2229.00 (81.74)        | 4415.31 (81.74)  | 5188.26 (81.74)  | 1.65E-40                 | 9.07E-18                 | 2.07E-41                 | 98.09               | 17.51               | 132.76              |
| Precuneus_R           | 1539.41 (49.77)        | 3138.38 (49.77)  | 3705.78 (49.77)  | 9.61E-42                 | 8.65E-19                 | 2.47E-43                 | 103.87              | 18.08               | 140.73              |
|                       |                        |                  |                  |                          |                          | Average % Change         | 105.70              | 20.00               | 146.61              |
| <b>Occipital Lobe</b> |                        |                  |                  |                          |                          |                          |                     |                     |                     |
| Occipital_Sup_L       | 572.07 (33.66)         | 1331.79 (33.66)  | 1435.89 (33.66)  | 3.98E-37                 | 1.18E-04                 | 8.47E-34                 | 132.80              | 7.82                | 151.00              |
| Occipital_Sup_R       | 633.15 (36.23)         | 1528.05 (36.23)  | 1680.63 (36.23)  | 4.76E-37                 | 3.60E-06                 | 8.44E-35                 | 141.34              | 9.99                | 165.44              |
| Occipital_Mid_L       | 1790.44 (72.25)        | 3762.77 (72.25)  | 4283.11 (72.25)  | 1.63E-41                 | 1.65E-13                 | 1.13E-40                 | 110.16              | 13.83               | 139.22              |
| Occipital_Mid_R       | 1384.27 (48.15)        | 2801.04 (48.15)  | 3150.83 (48.15)  | 8.21E-37                 | 7.76E-10                 | 3.46E-37                 | 102.35              | 12.49               | 127.62              |
| Occipital_Inf_L       | 470.40 (25.18)         | 957.40 (25.18)   | 1073.78 (25.18)  | 1.35E-33                 | 6.44E-08                 | 2.74E-32                 | 103.53              | 12.16               | 128.27              |
| Occipital_Inf_R       | 523.89 (39.34)         | 1124.57 (39.34)  | 1213.41 (39.34)  | 7.49E-31                 | 1.21E-03                 | 1.67E-27                 | 114.66              | 7.90                | 131.61              |
| Cuneus_L              | 1069.02 (52.46)        | 2356.67 (52.46)  | 2618.02 (52.46)  | 1.04E-37                 | 4.88E-08                 | 6.15E-36                 | 120.45              | 11.09               | 144.90              |
| Cuneus_R              | 945.63 (47.09)         | 2019.61 (47.09)  | 2298.51 (47.09)  | 1.52E-35                 | 8.50E-10                 | 5.95E-35                 | 113.57              | 13.81               | 143.07              |
| Calcarine_L           | 1462.22 (52.31)        | 2793.55 (52.31)  | 2996.31 (52.31)  | 2.55E-36                 | 4.14E-05                 | 4.99E-34                 | 91.05               | 7.26                | 104.91              |
| Calcarine_R           | 1239.38 (50.13)        | 2255.15 (50.13)  | 2394.34 (50.13)  | 8.23E-36                 | 2.47E-04                 | 2.53E-32                 | 81.96               | 6.17                | 93.19               |
| Lingual_L             | 1283.17 (52.27)        | 2348.41 (52.27)  | 2493.07 (52.27)  | 9.69E-38                 | 9.30E-05                 | 5.98E-34                 | 83.02               | 6.16                | 94.29               |
| Lingual_R             | 1155.16 (47.90)        | 2140.98 (47.90)  | 2243.87 (47.90)  | 2.34E-30                 | 2.22E-02                 | 1.77E-27                 | 85.34               | 4.81                | 94.25               |
| Fusiform_L            | 1370.29 (50.41)        | 2398.56 (50.41)  |                  |                          |                          |                          |                     |                     |                     |
