# Supplementary material
Source: PubMed Central journal article supplement (PMC4506327)
Supplement: supp_bhu027_bhu027supp_table6.pdf [file supp_bhu027_bhu027supp_table6.pdf]

**Table S10. Replicated Significant Cortical Thickness and Surface Area Gender Comparison Values and Growth Rates**

| Region of Interest        | Year 0<br>LS Mean (SE)<br>Females | Year 0<br>LS Mean (SE)<br>Males | Year 0<br>P Value | Year 1-Year 0<br>Males vs<br>Females<br>F(df) | Year 0 to 1<br>P Value | Year 2-Year 1<br>Males vs<br>Females<br>F(df) | Year 1 to 2<br>P Value |
|---------------------------|-----------------------------------|---------------------------------|-------------------|-----------------------------------------------|------------------------|-----------------------------------------------|------------------------|
| <b>Cortical Thickness</b> |                                   |                                 |                   |                                               |                        |                                               |                        |
| <i>Singleton Cohort</i>   |                                   |                                 |                   |                                               |                        |                                               |                        |
| Fusiform_L                | 2.27<br>(0.06)                    | 2.10<br>(0.05)                  | 3.87E-02          | 0.07(1, 76)                                   | 7.91E-01               | 1.15(1, 76)                                   | 2.87E-01               |
| <i>Twin Cohort</i>        |                                   |                                 |                   |                                               |                        |                                               |                        |
| Fusiform_L                | 2.27<br>(0.04)                    | 2.15<br>(0.04)                  | 4.62E-02          | 0.63(1, 58)                                   | 4.32E-01               | 0.00(1, 58)                                   | 9.54E-01               |
| <b>Surface Area</b>       |                                   |                                 |                   |                                               |                        |                                               |                        |
| <i>Singleton Cohort</i>   |                                   |                                 |                   |                                               |                        |                                               |                        |
| Precentral_L              | 1465.88<br>(59.11)                | 1459.27<br>(53.97)              | 9.34E-01          | 7.37(1, 76)                                   | 8.21E-03               | 0.00(1, 76)                                   | 9.61E-01               |
| Frontal_Sup_L             | 1306.89<br>(76.30)                | 1330.61<br>(69.78)              | 8.18E-01          | 3.99(1, 76)                                   | 4.93E-02               | 0.04(1, 76)                                   | 8.42E-01               |
| Frontal_Mid_L             | 2164.73<br>(112.06)               | 2280.72<br>(102.58)             | 4.45E-01          | 11.36(1, 76)                                  | 1.18E-03               | 2.78(1, 76)                                   | 9.95E-02               |
| Olfactory_L               | 183.23<br>(18.51)                 | 182.56<br>(16.88)               | 9.79E-01          | 4.60(1, 76)                                   | 3.52E-02               | 0.54(1, 76)                                   | 4.64E-01               |
| Insula_L                  | 1125.51<br>(59.87)                | 1196.84<br>(54.81)              | 3.80E-01          | 4.60(1, 76)                                   | 3.51E-02               | 0.01(1, 76)                                   | 9.37E-01               |
| Temporal_Mid_R            | 3049.63<br>(161.78)               | 3069.75<br>(147.83)             | 9.27E-01          | 0.57(1, 76)                                   | 4.52E-01               | 4.29(1, 76)                                   | 4.17E-02               |
| Parietal_Sup_L            | 786.96<br>(68.23)                 | 788.36<br>(62.31)               | 9.88E-01          | 5.13(1, 76)                                   | 2.64E-02               | 0.28(1, 76)                                   | 6.01E-01               |
| Calcarine_R               | 1277.69<br>(69.13)                | 1279.53<br>(63.18)              | 9.84E-01          | 6.67(1, 76)                                   | 1.17E-02               | 2.00(1, 76)                                   | 1.62E-01               |
| <i>Twin Cohort</i>        |                                   |                                 |                   |                                               |                        |                                               |                        |
| Precentral_L              | 1421.73<br>(83.28)                | 1416.21<br>(88.43)              | 9.65E-01          | 4.31(1, 58)                                   | 4.23E-02               | 2.38(1, 58)                                   | 1.29E-01               |
| Frontal_Sup_L             | 1186.56<br>(63.96)                | 1120.75<br>(67.89)              | 4.97E-01          | 4.44(1, 58)                                   | 3.95E-02               | 0.87(1, 58)                                   | 3.54E-01               |
| Frontal_Mid_L             | 2177.75<br>(148.55)               | 2046.90<br>(157.90)             | 5.61E-01          | 4.10(1, 58)                                   | 4.75E-02               | 2.81(1, 58)                                   | 9.92E-02               |
| Olfactory_L               | 192.19<br>(10.91)                 | 188.87<br>(11.45)               | 8.37E-01          | 4.12(1, 58)                                   | 4.70E-02               | 0.01(1, 58)                                   | 9.42E-01               |
| Insula_L                  | 1064.17<br>(42.08)                | 1116.96<br>(44.61)              | 4.07E-01          | 8.97(1, 58)                                   | 4.02E-03               | 0.07(1, 58)                                   | 7.87E-01               |
| Temporal_Mid_R            | 2883.38<br>(141.16)               | 2788.54<br>(149.40)             | 6.55E-01          | 6.17(1, 58)                                   | 1.59E-02               | 5.18(1, 58)                                   | 2.66E-02               |
| Parietal_Sup_L            | 783.24<br>(61.85)                 | 862.02<br>(65.45)               | 3.98E-01          | 4.78(1, 58)                                   | 3.28E-02               | 0.50(1, 58)                                   | 4.80E-01               |
| Calcarine_R               | 1326.50<br>(71.06)                | 1152.27<br>(75.40)              | 1.08E-01          | 5.11(1, 58)                                   | 2.75E-02               | 3.99(1, 58)                                   | 5.04E-02               |
