# Supplementary material
Source: PubMed Central journal article supplement (PMC4506327)
Supplement: supp_bhu027_bhu027supp_table7.pdf [file supp_bhu027_bhu027supp_table7.pdf]

| Region of Interest    | LSMeans (SE) for Child<br>n = 40 | LS Means (SE) for Adult<br>n = 43 | P-value         | % of Adult Value |
|-----------------------|----------------------------------|-----------------------------------|-----------------|------------------|
| <b>Central Region</b> |                                  |                                   |                 |                  |
| Precentral_L          | 2.56 ( 0.07)                     | 2.85 ( 0.07)                      | 2.76E-02        | 89.82            |
| Precentral_R          | 2.44 ( 0.07)                     | 2.87 ( 0.06)                      | 1.22E-03        | 85.02            |
| Postcentral_L         | 3.02 ( 0.09)                     | 3.02 ( 0.08)                      | 4.61E-01        | 96.73            |
| Postcentral_R         | 2.88 ( 0.10)                     | 3.06 ( 0.09)                      | 3.47E-03        | 87.20            |
| Rolandic_Oper_L       | 3.60 ( 0.13)                     | 3.01 ( 0.12)                      | 5.68E-01        | 97.54            |
| Rolandic_Oper_R       | 3.45 ( 0.13)                     | 3.13 ( 0.12)                      | 7.44E-01        | 98.76            |
|                       |                                  |                                   | <b>Average:</b> | <b>92.51</b>     |
| <b>Frontal Lobe</b>   |                                  |                                   |                 |                  |
|                       | Lateral Surface                  |                                   |                 |                  |
| Frontal_Sup_L         | 2.92 ( 0.09)                     | 3.21 ( 0.08)                      | 9.95E-01        | 100.00           |
| Frontal_Sup_R         | 2.92 ( 0.10)                     | 3.25 ( 0.09)                      | 3.47E-01        | 94.12            |
| Frontal_Mid_L         | 3.48 ( 0.13)                     | 3.17 ( 0.12)                      | 7.83E-02        | 90.97            |
| Frontal_Mid_R         | 3.57 ( 0.13)                     | 3.25 ( 0.12)                      | 9.39E-02        | 89.85            |
| Frontal_Inf_Oper_L    | 3.03 ( 0.06)                     | 3.21 ( 0.06)                      | 1.17E-01        | 94.39            |
| Frontal_Inf_Oper_R    | 2.98 ( 0.06)                     | 3.29 ( 0.06)                      | 1.17E-02        | 90.58            |
| Frontal_Inf_Tri_L     | 3.00 ( 0.07)                     | 3.08 ( 0.06)                      | 5.33E-01        | 97.40            |
| Frontal_Inf_Tri_R     | 2.96 ( 0.09)                     | 3.18 ( 0.09)                      | 2.11E-01        | 93.08            |
|                       |                                  |                                   | <b>Average:</b> | <b>93.80</b>     |
|                       | Medial Surface                   |                                   |                 |                  |
| Frontal_Sup_Medial_L  | 3.47 ( 0.09)                     | 3.34 ( 0.09)                      | 5.87E-01        | 97.06            |
| Frontal_Sup_Medial_R  | 3.58 ( 0.09)                     | 3.46 ( 0.09)                      | 6.43E-01        | 102.59           |
| Supp_Motor_Area_L     | 3.17 ( 0.07)                     | 3.25 ( 0.07)                      | 9.96E-01        | 100.00           |
| Supp_Motor_Area_R     | 3.19 ( 0.07)                     | 3.23 ( 0.07)                      | 6.61E-02        | 109.56           |
| Paracentral_Lobule_L  | 3.08 ( 0.11)                     | 3.08 ( 0.11)                      | 8.66E-01        | 101.32           |
| Paracentral_Lobule_R  | 3.21 ( 0.08)                     | 2.93 ( 0.07)                      | 1.30E-01        | 108.02           |
|                       |                                  |                                   | <b>Average:</b> | <b>103.09</b>    |
|                       | Orbital Surface                  |                                   |                 |                  |
| Frontal_Sup_Orb_L     | 3.32 ( 0.22)                     | 3.82 ( 0.21)                      | 1.97E-02        | 119.60           |
| Frontal_Sup_Orb_R     | 3.18 ( 0.15)                     | 3.92 ( 0.14)                      | 1.70E-01        | 110.22           |
| Frontal_Med_Orb_L     | 3.63 ( 0.11)                     | 3.74 ( 0.10)                      | 9.94E-01        | 100.00           |
| Frontal_Med_Orb_R     | 3.56 ( 0.10)                     | 3.47 ( 0.10)                      | 5.85E-01        | 104.04           |
| Frontal_Mid_Orb_L     | 3.58 ( 0.13)                     | 3.58 ( 0.12)                      | 2.06E-01        | 109.78           |
| Frontal_Mid_Orb_R     | 3.35 ( 0.12)                     | 3.22 ( 0.12)                      | 1.97E-01        | 109.85           |
| Frontal_Inf_Orb_L     | 3.70 ( 0.16)                     | 3.67 ( 0.15)                      | 4.67E-01        | 103.89           |
| Frontal_Inf_Orb_R     | 3.45 ( 0.18)                     | 3.46 ( 0.17)                      | 4.79E-01        | 103.47           |
| Rectus_L              | 3.52 ( 0.06)                     | 3.40 ( 0.06)                      | 9.02E-01        | 100.82           |
| Rectus_R              | 3.32 ( 0.07)                     | 3.62 ( 0.07)                      | 9.74E-01        | 99.71            |
| Olfactory_L           | 3.17 ( 0.09)                     | 3.14 ( 0.09)                      | 2.25E-01        | 86.91            |
| Olfactory_R           | 3.28 ( 0.07)                     | 3.13 ( 0.07)                      | 1.12E-02        | 81.12            |
|                       |                                  |                                   | <b>Average:</b> | <b>102.45</b>    |
| <b>Temporal Lobe</b>  |                                  |                                   |                 |                  |
| Temporal_Sup_L        | 2.72 ( 0.08)                     | 3.09 ( 0.07)                      | 5.49E-01        | 103.23           |
| Temporal_Sup_R        | 2.72 ( 0.06)                     | 2.89 ( 0.06)                      | 9.07E-01        | 100.64           |
| Heschl_L              | 2.08 ( 0.10)                     | 2.17 ( 0.09)                      | 9.89E-01        | 100.00           |
| Heschl_R              | 1.71 ( 0.12)                     | 2.08 ( 0.11)                      | 4.13E-01        | 106.19           |
| Temporal_Mid_L        | 2.41 ( 0.10)                     | 2.61 ( 0.09)                      | 8.43E-01        | 99.04            |
| Temporal_Mid_R        | 2.25 ( 0.10)                     | 2.73 ( 0.10)                      | 1.24E-01        | 92.50            |
| Temporal_Inf_L        | 2.56 ( 0.06)                     | 2.48 ( 0.06)                      | 7.22E-01        | 98.45            |
| Temporal_Inf_R        | 2.57 ( 0.07)                     | 2.68 ( 0.06)                      | 4.96E-03        | 87.20            |
| Temporal_Pole_Sup_L   | 2.35 ( 0.07)                     | 2.71 ( 0.06)                      | 1.74E-03        | 123.82           |
| Temporal_Pole_Sup_R   | 2.30 ( 0.09)                     | 3.00 ( 0.08)                      | 4.19E-02        | 115.69           |
| Temporal_Pole_Mid_L   | 2.46 ( 0.07)                     | 2.56 ( 0.07)                      | 1.70E-01        | 119.50           |
| Temporal_Pole_Mid_R   | 2.34 ( 0.08)                     | 2.66 ( 0.07)                      | 4.15E-02        | 126.84           |
|                       |                                  |                                   | <b>Average:</b> | <b>106.09</b>    |
| <b>Insula</b>         |                                  |                                   |                 |                  |
| Insula_L              | 2.62 ( 0.08)                     | 2.77 ( 0.08)                      | 3.18E-01        | 103.53           |
| Insula_R              | 2.41 ( 0.07)                     | 2.79 ( 0.07)                      | 2.62E-02        | 91.71            |
|                       |                                  |                                   | <b>Average:</b> | <b>97.62</b>     |
| <b>Cingulate</b>      |                                  |                                   |                 |                  |

|                       |              |              |                 |              |
|-----------------------|--------------|--------------|-----------------|--------------|
| Cingulate_Ant_L       | 2.69 ( 0.11) | 2.88 ( 0.10) | 8.49E-01        | 100.96       |
| Cingulate_Ant_R       | 2.34 ( 0.12) | 3.10 ( 0.11) | 2.70E-01        | 104.79       |
| Cingulate_Mid_L       | 2.44 ( 0.06) | 3.00 ( 0.06) | 1.13E-02        | 88.03        |
| Cingulate_Mid_R       | 2.44 ( 0.06) | 3.01 ( 0.06) | 1.40E-01        | 94.12        |
| Cingulate_Post_L      | 2.37 ( 0.06) | 2.45 ( 0.05) | 6.58E-01        | 95.85        |
| Cingulate_Post_R      | 2.18 ( 0.06) | 2.50 ( 0.05) | 9.27E-02        | 82.21        |
|                       |              |              | <b>Average:</b> | <b>94.33</b> |
| <b>Parietal Lobe</b>  |              |              |                 |              |
| Parietal_Sup_L        | 2.44 ( 0.10) | 2.74 ( 0.09) | 1.04E-01        | 89.05        |
| Parietal_Sup_R        | 2.47 ( 0.13) | 2.76 ( 0.12) | 2.38E-01        | 89.49        |
| Parietal_Inf_L        | 2.79 ( 0.08) | 2.90 ( 0.08) | 4.81E-01        | 96.21        |
| Parietal_Inf_R        | 2.70 ( 0.08) | 2.96 ( 0.07) | 8.34E-02        | 91.22        |
| Angular_L             | 3.07 ( 0.11) | 2.99 ( 0.10) | 6.42E-01        | 96.73        |
| Angular_R             | 2.94 ( 0.10) | 2.91 ( 0.10) | 5.73E-01        | 95.65        |
| SupraMarginal_L       | 2.96 ( 0.11) | 3.06 ( 0.10) | 7.06E-01        | 102.68       |
| SupraMarginal_R       | 2.86 ( 0.12) | 2.99 ( 0.11) | 9.01E-01        | 101.03       |
| Precuneus_L           | 2.77 ( 0.06) | 2.78 ( 0.05) | 9.97E-01        | 99.64        |
| Precuneus_R           | 2.80 ( 0.07) | 2.91 ( 0.07) | 4.32E-01        | 96.22        |
|                       |              |              | <b>Average:</b> | <b>95.79</b> |
| <b>Occipital Lobe</b> |              |              |                 |              |
| Occipital_Sup_L       | 2.30 ( 0.08) | 2.27 ( 0.08) | 5.01E-01        | 96.09        |
| Occipital_Sup_R       | 2.56 ( 0.07) | 2.37 ( 0.06) | 2.99E-02        | 87.97        |
| Occipital_Mid_L       | 2.87 ( 0.09) | 2.87 ( 0.08) | 3.24E-01        | 94.58        |
| Occipital_Mid_R       | 3.26 ( 0.12) | 3.07 ( 0.11) | 5.78E-03        | 86.38        |
| Occipital_Inf_L       | 3.20 ( 0.09) | 3.10 ( 0.08) | 3.55E-01        | 93.40        |
| Occipital_Inf_R       | 3.14 ( 0.09) | 3.12 ( 0.08) | 1.07E-03        | 75.48        |
| Cuneus_L              | 4.47 ( 0.14) | 3.61 ( 0.13) | 5.42E-01        | 103.23       |
| Cuneus_R              | 4.35 ( 0.15) | 3.76 ( 0.14) | 3.95E-01        | 95.90        |
| Calcarine_L           | 3.10 ( 0.08) | 3.13 ( 0.07) | 2.65E-01        | 92.34        |
| Calcarine_R           | 2.96 ( 0.09) | 3.20 ( 0.08) | 1.68E-02        | 82.42        |
| Lingual_L             | 4.29 ( 0.27) | 3.59 ( 0.26) | 4.83E-03        | 86.72        |
| Lingual_R             | 4.30 ( 0.23) | 3.39 ( 0.22) | 3.34E-05        | 76.67        |
| Fusiform_L            | 3.17 ( 0.07) | 3.22 ( 0.07) | 5.19E-06        | 81.33        |
| Fusiform_R            | 2.93 ( 0.08) | 3.36 ( 0.07) | 4.68E-06        | 81.06        |
|                       |              |              | <b>Average:</b> | <b>88.11</b> |
