# Supplementary material
Source: PubMed Central journal article supplement (PMC4506327)
Supplement: supp_bhu027_bhu027supp_table8.pdf [file supp_bhu027_bhu027supp_table8.pdf]

| Region of Interest      | LSMeans (SE) for Child<br>n = 40 | LSMeans (SE) for Adult<br>n = 43 | P-Value  | % of Adult Value |
|-------------------------|----------------------------------|----------------------------------|----------|------------------|
| <b>Central Region</b>   |                                  |                                  |          |                  |
| Precentral_L            | 2659.68 ( 218.59)                | 5012.99 ( 204.47)                | 1.48E-07 | 53.06            |
| Precentral_R            | 3232.12 ( 189.60)                | 4417.42 ( 177.36)                | 1.24E-03 | 73.17            |
| Postcentral_L           | 2808.20 ( 170.07)                | 3796.31 ( 159.09)                | 1.12E-03 | 72.99            |
| Postcentral_R           | 2794.79 ( 209.82)                | 5173.14 ( 196.28)                | 2.67E-01 | 87.76            |
| Rolandic_Oper_L         | 915.43 ( 70.58)                  | 1238.20 ( 66.02)                 | 8.29E-06 | 55.53            |
| Rolandic_Oper_R         | 864.89 ( 87.22)                  | 1734.06 ( 81.59)                 | 1.20E-05 | 58.50            |
| <b>Average Percent:</b> |                                  |                                  |          | <b>66.83</b>     |
| <b>Frontal Lobe</b>     |                                  |                                  |          |                  |
| <i>Lateral Surface</i>  |                                  |                                  |          |                  |
| Frontal_Sup_L           | 4915.95 ( 287.48)                | 6252.05 ( 268.92)                | 2.57E-03 | 73.97            |
| Frontal_Sup_R           | 4688.91 ( 309.76)                | 6266.77 ( 289.76)                | 4.09E-08 | 54.03            |
| Frontal_Mid_L           | 790.17 ( 73.50)                  | 1512.43 ( 68.75)                 | 1.48E-02 | 78.63            |
| Frontal_Mid_R           | 1127.99 ( 99.20)                 | 1362.56 ( 92.80)                 | 7.80E-03 | 74.82            |
| Frontal_Inf_Oper_L      | 558.73 ( 122.42)                 | 1759.88 ( 114.52)                | 1.20E-06 | 31.75            |
| Frontal_Inf_Oper_R      | 1173.59 ( 142.09)                | 2327.36 ( 132.92)                | 3.99E-05 | 50.43            |
| Frontal_Inf_Tri_L       | 2663.61 ( 215.29)                | 3555.11 ( 201.39)                | 2.93E-02 | 74.92            |
| Frontal_Inf_Tri_R       | 2050.75 ( 170.63)                | 2431.45 ( 159.62)                | 2.35E-01 | 84.34            |
| <b>Average Percent:</b> |                                  |                                  |          | <b>65.36</b>     |
| <i>Medial Surface</i>   |                                  |                                  |          |                  |
| Frontal_Sup_Medial_L    | 1365.02 ( 158.46)                | 3463.30 ( 148.23)                | 3.09E-01 | 89.50            |
| Frontal_Sup_Medial_R    | 1732.65 ( 146.76)                | 2888.56 ( 137.29)                | 3.40E-03 | 67.64            |
| Supp_Motor_Area_L       | 1021.74 ( 91.95)                 | 1839.97 ( 86.02)                 | 1.84E-02 | 76.52            |
| Supp_Motor_Area_R       | 1400.66 ( 113.99)                | 2394.28 ( 106.63)                | 9.59E-07 | 55.65            |
| Paracentral_Lobule_L    | 1900.45 ( 129.84)                | 2483.45 ( 121.46)                | 2.94E-02 | 70.11            |
| Paracentral_Lobule_R    | 1652.07 ( 132.78)                | 2968.87 ( 124.21)                | 4.90E-04 | 52.31            |
| <b>Average Percent:</b> |                                  |                                  |          | <b>68.62</b>     |
| <i>Orbital Surface</i>  |                                  |                                  |          |                  |
| Frontal_Sup_Orb_L       | 295.83 ( 49.73)                  | 645.14 ( 46.52)                  | 1.64E-02 | 73.93            |
| Frontal_Sup_Orb_R       | 336.52 ( 44.36)                  | 720.80 ( 41.50)                  | 8.65E-07 | 49.88            |
| Frontal_Med_Orb_L       | 2558.42 ( 157.21)                | 2858.58 ( 147.06)                | 7.61E-02 | 78.85            |
| Frontal_Med_Orb_R       | 1669.52 ( 141.73)                | 2468.21 ( 132.58)                | 8.88E-06 | 50.66            |
| Frontal_Mid_Orb_L       | 678.00 ( 54.23)                  | 859.83 ( 50.72)                  | 1.17E-06 | 52.25            |
| Frontal_Mid_Orb_R       | 759.23 ( 83.40)                  | 1498.56 ( 78.01)                 | 2.09E-01 | 82.78            |
| Frontal_Inf_Orb_L       | 560.60 ( 96.44)                  | 1220.85 ( 90.21)                 | 4.85E-10 | 39.41            |
| Frontal_Inf_Orb_R       | 523.62 ( 99.56)                  | 1371.94 ( 93.14)                 | 6.43E-05 | 59.98            |
| Rectus_L                | 2082.70 ( 139.40)                | 2651.14 ( 130.40)                | 4.39E-04 | 45.92            |
| Rectus_R                | 2121.70 ( 134.47)                | 2280.74 ( 125.79)                | 1.79E-05 | 38.17            |
| Olfactory_L             | 1465.69 ( 147.01)                | 2842.79 ( 137.52)                | 3.19E-04 | 45.86            |
| Olfactory_R             | 1599.99 ( 139.46)                | 2711.23 ( 130.45)                | 1.34E-05 | 46.69            |
| <b>Average Percent:</b> |                                  |                                  |          | <b>55.36</b>     |
| <b>Temporal Lobe</b>    |                                  |                                  |          |                  |
| Temporal_Sup_L          | 1911.88 ( 150.15)                | 3706.88 ( 140.45)                | 3.82E-03 | 72.13            |
| Temporal_Sup_R          | 1865.52 ( 171.55)                | 4756.01 ( 160.48)                | 4.08E-02 | 78.73            |
| Heschl_L                | 357.33 ( 82.26)                  | 1154.28 ( 76.95)                 | 8.26E-01 | 104.44           |
| Heschl_R                | 207.30 ( 53.64)                  | 922.65 ( 50.18)                  | 1.88E-01 | 66.63            |
| Temporal_Mid_L          | 2956.85 ( 209.03)                | 3753.74 ( 195.53)                | 1.44E-04 | 65.32            |
| Temporal_Mid_R          | 2310.93 ( 168.18)                | 3146.43 ( 157.32)                | 5.11E-02 | 81.12            |
| Temporal_Inf_L          | 2633.79 ( 165.58)                | 2256.29 ( 154.89)                | 4.34E-02 | 79.21            |
| Temporal_Inf_R          | 2272.88 ( 148.72)                | 2666.94 ( 139.12)                | 4.42E-01 | 92.90            |
| Temporal_Pole_Sup_L     | 2258.45 ( 212.97)                | 4692.24 ( 199.22)                | 9.62E-01 | 98.79            |
| Temporal_Pole_Sup_R     | 2333.99 ( 184.37)                | 4460.66 ( 172.47)                | 7.71E-01 | 107.25           |
| Temporal_Pole_Mid_L     | 1466.81 ( 134.09)                | 2163.80 ( 125.43)                | 5.11E-01 | 76.39            |
| Temporal_Pole_Mid_R     | 1702.95 ( 146.77)                | 2297.56 ( 137.29)                | 6.86E-01 | 113.33           |
| <b>Average Percent:</b> |                                  |                                  |          | <b>86.35</b>     |
| <b>Insula</b>           |                                  |                                  |          |                  |
| Insula_L                | 3852.40 ( 302.51)                | 6038.02 ( 282.98)                | 3.18E-02 | 78.56            |
| Insula_R                | 2916.14 ( 207.94)                | 3758.90 ( 194.52)                | 5.28E-01 | 93.03            |
| <b>Average Percent:</b> |                                  |                                  |          | <b>85.79</b>     |
| <b>Cingulate</b>        |                                  |                                  |          |                  |
| Cingulate_Ant_L         | 1154.59 ( 116.47)                | 1603.22 ( 108.95)                | 3.11E-06 | 51.56            |
| Cingulate_Ant_R         | 1322.48 ( 130.45)                | 2028.80 ( 122.03)                | 5.37E-05 | 59.01            |
| Cingulate_Mid_L         | 3174.41 ( 194.53)                | 3942.01 ( 181.97)                | 9.86E-09 | 51.58            |
| Cingulate_Mid_R         | 3395.05 ( 216.68)                | 3696.58 ( 202.69)                | 8.44E-14 | 39.22            |
| Cingulate_Post_L        | 4128.16 ( 242.11)                | 5655.87 ( 226.48)                | 1.57E-06 | 30.96            |
| Cingulate_Post_R        | 4279.24 ( 286.13)                | 4876.11 ( 267.66)                | 3.88E-10 | 22.47            |
| <b>Average Percent:</b> |                                  |                                  |          | <b>42.47</b>     |
| <b>Parietal Lobe</b>    |                                  |                                  |          |                  |
| Parietal_Sup_L          | 2329.24 ( 211.86)                | 3208.20 ( 198.18)                | 2.90E-02 | 72.60            |
| Parietal_Sup_R          | 2713.69 ( 244.61)                | 3346.33 ( 228.81)                | 1.70E-01 | 81.09            |
| Parietal_Inf_L          | 2602.45 ( 254.35)                | 4472.24 ( 237.93)                | 1.74E-04 | 58.19            |
| Parietal_Inf_R          | 1890.01 ( 174.91)                | 2435.80 ( 163.62)                | 9.84E-02 | 77.59            |
| Angular_L               | 1077.86 ( 129.48)                | 1910.08 ( 121.12)                | 8.92E-01 | 97.62            |
| Angular_R               | 2192.98 ( 196.41)                | 2799.85 ( 183.73)                | 3.28E-01 | 85.05            |
| SupraMarginal_L         | 2145.06 ( 206.12)                | 2197.31 ( 192.81)                | 9.16E-04 | 56.43            |
| SupraMarginal_R         | 2684.65 ( 256.98)                | 3156.66 ( 240.39)                | 1.02E-01 | 78.32            |
| Precuneus_L             | 5075.20 ( 252.27)                | 5950.29 ( 235.98)                | 6.67E-02 | 85.29            |
| Precuneus_R             | 3087.52 ( 240.96)                | 6639.37 ( 225.41)                | 1.36E-11 | 46.50            |
| <b>Average Percent:</b> |                                  |                                  |          | <b>73.87</b>     |
| <b>Occipital Lobe</b>   |                                  |                                  |          |                  |
| Occipital_Sup_L         | 992.99 ( 102.29)                 | 1416.26 ( 95.68)                 | 6.67E-03 | 67.79            |
| Occipital_Sup_R         | 515.33 ( 69.24)                  | 985.07 ( 64.77)                  | 3.29E-02 | 74.12            |
| Occipital_Mid_L         | 274.32 ( 28.30)                  | 262.66 ( 26.47)                  | 2.21E-04 | 63.80            |
| Occipital_Mid_R         | 192.00 ( 38.79)                  | 288.18 ( 36.29)                  | 3.28E-02 | 77.58            |
| Occipital_Inf_L         | 3188.78 ( 221.62)                | 4421.04 ( 207.32)                | 4.22E-02 | 72.02            |
| Occipital_Inf_R         | 3461.28 ( 241.03)                | 4396.58 ( 225.47)                | 4.80E-03 | 65.19            |
| Cuneus_L                | 887.69 ( 121.20)                 | 898.52 ( 113.38)                 | 2.25E-01 | 116.73           |
| Cuneus_R                | 991.86 ( 122.85)                 | 924.78 ( 114.92)                 | 1.59E-01 | 85.22            |
| Calcarine_L             | 5326.02 ( 379.35)                | 8153.94 ( 354.86)                | 4.43E-02 | 78.77            |
| Calcarine_R             | 5946.26 ( 374.41)                | 7330.02 ( 350.23)                | 9.38E-03 | 73.45            |
| Lingual_L               | 586.00 ( 146.95)                 | 767.12 ( 137.46)                 | 3.31E-08 | 48.13            |
| Lingual_R               | 1057.91 ( 164.49)                | 933.49 ( 153.87)                 | 2.59E-08 | 52.32            |
| Fusiform_L              | 3543.97 ( 242.89)                | 4474.07 ( 227.21)                | 3.76E-02 | 80.53            |
| Fusiform_R              | 4877.42 ( 258.56)                | 5249.97 ( 241.86)                | 4.58E-01 | 91.84            |
| <b>Average Percent:</b> |                                  |                                  |          | <b>74.82</b>     |
