# Supplementary material
Source: PubMed Central journal article supplement (PMC4506327)
Supplement: supp_bhu027_bhu027supp_table9.pdf [file supp_bhu027_bhu027supp_table9.pdf]

| Singleton Cohort     |                     |          |                      |                     |          | Twin Cohort          |                     |          |                      |                     |          |
|----------------------|---------------------|----------|----------------------|---------------------|----------|----------------------|---------------------|----------|----------------------|---------------------|----------|
| Birth to 1 Year      |                     |          | 1 to 2 Years         |                     |          | Birth to 1 Year      |                     |          | 1 to 2 Years         |                     |          |
| Region of Interest   | Partial Correlation | P-Value  | Region of Interest   | Partial Correlation | P-value  | Region of Interest   | Partial Correlation | P-Value  | Region of Interest   | Partial Correlation | P-value  |
| Parietal_Inf_L       | 0.69                | 1.89E-06 | SupraMarginal_R      | 0.85                | 9.35E-12 | Occipital_Mid_L      | 0.68                | 5.64E-05 | Precentral_R         | 0.54                | 2.32E-03 |
| Temporal_Inf_L       | 0.64                | 1.67E-05 | Angular_R            | 0.81                | 5.33E-10 | Precentral_R         | 0.58                | 1.09E-03 | Parietal_Sup_R       | 0.43                | 2.02E-02 |
| Frontal_Mid_Orb_L    | 0.63                | 2.47E-05 | Temporal_Mid_R       | 0.80                | 2.05E-09 | Calcarine_L          | 0.48                | 8.21E-03 | Parietal_Sup_L       | 0.39                | 3.88E-02 |
| Occipital_Inf_L      | 0.58                | 1.56E-04 | Frontal_Mid_Orb_L    | 0.80                | 2.34E-09 | Fusiform_R           | 0.48                | 8.29E-03 | Precentral_L         | 0.33                | 7.77E-02 |
| Insula_L             | 0.55                | 3.93E-04 | Parietal_Inf_L       | 0.76                | 3.89E-08 | Frontal_Mid_R        | 0.47                | 9.76E-03 | Frontal_Mid_L        | 0.33                | 7.98E-02 |
| Frontal_Mid_Orb_R    | 0.52                | 7.96E-04 | Cingulum_Mid_R       | 0.75                | 5.64E-08 | Precentral_L         | 0.44                | 1.77E-02 | Parietal_Inf_L       | 0.29                | 1.25E-01 |
| Olfactory_L          | 0.51                | 1.08E-03 | Occipital_Mid_L      | 0.71                | 7.43E-07 | Frontal_Inf_Oper_L   | 0.42                | 2.22E-02 | Angular_R            | 0.27                | 1.64E-01 |
| Temporal_Inf_R       | 0.45                | 5.00E-03 | Temporal_Inf_L       | 0.68                | 2.13E-06 | SupraMarginal_R      | 0.38                | 4.17E-02 | Cuneus_R             | 0.25                | 1.94E-01 |
| Parietal_Sup_R       | 0.43                | 6.82E-03 | Frontal_Inf_Orb_L    | 0.67                | 4.34E-06 | Temporal_Inf_R       | 0.36                | 5.38E-02 | Frontal_Sup_R        | 0.24                | 2.09E-01 |
| Frontal_Inf_Orb_L    | 0.42                | 8.70E-03 | Occipital_Inf_L      | 0.65                | 1.08E-05 | Insula_L             | 0.36                | 5.48E-02 | Parietal_Inf_R       | 0.24                | 2.15E-01 |
| Fusiform_L           | 0.41                | 1.08E-02 | Frontal_Mid_Orb_R    | 0.65                | 1.11E-05 | Occipital_Inf_L      | 0.35                | 6.48E-02 | Cingulum_Post_L      | 0.23                | 2.30E-01 |
| Occipital_Mid_R      | 0.40                | 1.22E-02 | SupraMarginal_L      | 0.62                | 3.68E-05 | Temporal_Mid_R       | 0.34                | 6.85E-02 | Occipital_Mid_L      | 0.21                | 2.73E-01 |
| Frontal_Sup_Orb_L    | 0.39                | 1.59E-02 | Frontal_Sup_Orb_R    | 0.61                | 4.26E-05 | Parietal_Inf_L       | 0.33                | 8.15E-02 | Angular_L            | 0.16                | 4.04E-01 |
| Frontal_Mid_L        | 0.38                | 1.82E-02 | Temporal_Mid_L       | 0.59                | 8.23E-05 | Cuneus_R             | 0.32                | 9.11E-02 | SupraMarginal_R      | 0.15                | 4.24E-01 |
| Parietal_Inf_R       | 0.37                | 2.37E-02 | Occipital_Mid_R      | 0.57                | 1.94E-04 | Frontal_Sup_L        | 0.31                | 9.66E-02 | Occipital_Mid_R      | 0.15                | 4.51E-01 |
| Cingulum_Mid_R       | 0.36                | 2.61E-02 | Occipital_Sup_L      | 0.54                | 4.78E-04 | Temporal_Mid_L       | 0.30                | 1.16E-01 | Insula_L             | 0.14                | 4.85E-01 |
| Cingulum_Post_L      | 0.34                | 3.80E-02 | Parietal_Sup_L       | 0.53                | 7.12E-04 | Occipital_Inf_R      | 0.28                | 1.37E-01 | Paracentral_Lobule_L | 0.12                | 5.38E-01 |
| Lingual_L            | 0.33                | 4.30E-02 | Frontal_Inf_Orb_R    | 0.50                | 1.45E-03 | Calcarine_R          | 0.27                | 1.54E-01 | Frontal_Sup_R        | 0.11                | 5.76E-01 |
| Occipital_Inf_R      | 0.32                | 4.69E-02 | Frontal_Sup_Medial_R | 0.49                | 1.92E-03 | Frontal_Mid_L        | 0.27                | 1.61E-01 | Frontal_Sup_L        | 0.08                | 6.70E-01 |
| Frontal_Inf_Orb_R    | 0.32                | 5.01E-02 | Fusiform_L           | 0.48                | 2.08E-03 | Occipital_Mid_R      | 0.26                | 1.72E-01 | Occipital_Inf_R      | 0.08                | 6.75E-01 |
| Cingulum_Mid_L       | 0.32                | 5.15E-02 | Frontal_Sup_Orb_L    | 0.43                | 7.68E-03 | Cingulum_Post_R      | 0.25                | 1.87E-01 | SupraMarginal_L      | 0.07                | 7.32E-01 |
| Frontal_Med_Orb_L    | 0.30                | 6.80E-02 | Angular_L            | 0.42                | 8.24E-03 | Rolandic_Oper_R      | 0.24                | 2.03E-01 | Supp_Motor_Area_R    | 0.04                | 8.40E-01 |
| Frontal_Inf_Tri_L    | 0.30                | 7.22E-02 | Paracentral_Lobule_L | 0.41                | 1.09E-02 | Insula_R             | 0.23                | 2.22E-01 | Occipital_Sup_R      | 0.03                | 8.84E-01 |
| Insula_R             | 0.28                | 9.15E-02 | Lingual_L            | 0.40                | 1.26E-02 | Precuneus_R          | 0.23                | 2.33E-01 | Olfactory_L          | 0.03                | 8.84E-01 |
| Occipital_Mid_L      | 0.27                | 1.01E-01 | Temporal_Sup_R       | 0.39                | 1.49E-02 | Supp_Motor_Area_L    | 0.22                | 2.43E-01 | Frontal_Mid_R        | 0.03                | 8.88E-01 |
| Temporal_Mid_R       | 0.26                | 1.21E-01 | Temporal_Pole_Mid_L  | 0.37                | 2.21E-02 | Frontal_Inf_Oper_R   | 0.22                | 2.49E-01 | Temporal_Inf_L       | 0.02                | 9.21E-01 |
| Temporal_Mid_L       | 0.24                | 1.49E-01 | Parietal_Sup_L       | 0.34                | 3.47E-02 | Cingulum_Mid_L       | 0.22                | 2.52E-01 | Occipital_Sup_L      | 0.01                | 9.75E-01 |
| Paracentral_Lobule_R | 0.23                | 1.67E-01 | Cingulum_Mid_L       | 0.29                | 8.07E-02 | Frontal_Sup_R        | 0.22                | 2.63E-01 | Frontal_Sup_Medial_R | 0.00                | 9.93E-01 |
| Angular_L            | 0.23                | 1.67E-01 | Heschl_L             | 0.28                | 8.54E-02 | Occipital_Sup_R      | 0.20                | 2.95E-01 | Supp_Motor_Area_L    | -0.04               | 8.80E-01 |
| Occipital_Sup_L      | 0.21                | 2.11E-01 | Frontal_Med_Orb_R    | 0.26                | 1.15E-01 | Frontal_Mid_Orb_R    | 0.18                | 3.59E-01 | Precuneus_L          | -0.08               | 6.97E-01 |
| Cuneus_L             | 0.19                | 2.57E-01 | Frontal_Med_Orb_L    | 0.23                | 1.59E-01 | Parietal_Inf_R       | 0.16                | 3.93E-01 | Frontal_Inf_Tri_R    | -0.09               | 6.53E-01 |
| Frontal_Sup_Orb_R    | 0.19                | 2.62E-01 | Cingulum_Ant_R       | 0.22                | 1.94E-01 | Temporal_Sup_R       | 0.14                | 4.58E-01 | Heschl_R             | -0.10               | 6.14E-01 |
| Cingulum_Ant_L       | 0.16                | 3.26E-01 | Frontal_Inf_Orb_L    | 0.21                | 2.02E-01 | Angular_R            | 0.13                | 4.93E-01 | Temporal_Pole_Mid_L  | -0.10               | 6.03E-01 |
| Frontal_Sup_R        | 0.15                | 3.74E-01 | Supp_Motor_Area_R    | 0.20                | 2.29E-01 | Cingulum_Mid_R       | 0.12                | 5.35E-01 | Postcentral_R        | -0.12               | 5.41E-01 |
| Fusiform_R           | 0.13                | 4.21E-01 | Fusiform_R           | 0.19                | 2.50E-01 | Temporal_Inf_L       | 0.12                | 5.47E-01 | Lingual_R            | -0.13               | 5.02E-01 |
| Precuneus_R          | 0.13                | 4.41E-01 | Insula_L             | 0.18                | 2.74E-01 | Angular_L            | 0.12                | 5.52E-01 | Temporal_Inf_R       | -0.13               | 4.90E-01 |
| Angular_R            | 0.13                | 4.49E-01 | Cingulum_Post_L      | 0.14                | 3.99E-01 | Frontal_Sup_Orb_L    | 0.11                | 5.66E-01 | Precuneus_R          | -0.14               | 4.79E-01 |
| Lingual_R            | 0.12                | 4.66E-01 | Postcentral_R        | 0.14                | 4.09E-01 | Parietal_Sup_R       | 0.09                | 6.24E-01 | Fusiform_L           | -0.15               | 4.37E-01 |
| Paracentral_Lobule_L | 0.09                | 5.83E-01 | Precentral_L         | 0.14                | 4.18E-01 | Frontal_Mid_Orb_L    | 0.09                | 6.49E-01 | Olfactory_R          | -0.18               | 3.47E-01 |
| Heschl_R             | 0.08                | 6.42E-01 | Temporal_Inf_R       | 0.12                | 4.61E-01 | Cingulum_Post_L      | 0.09                | 6.54E-01 | Frontal_Med_Orb_R    | -0.19               | 3.25E-01 |
| Calcarine_R          | 0.07                | 6.74E-01 | Frontal_Mid_L        | 0.12                | 4.88E-01 | Frontal_Inf_Tri_L    | 0.08                | 6.72E-01 | Frontal_Mid_Orb_L    | -0.21               | 2.67E-01 |
| Frontal_Sup_L        | 0.06                | 7.01E-01 | Occipital_Inf_R      | 0.08                | 6.40E-01 | Parietal_Sup_L       | 0.08                | 6.84E-01 | Cuneus_L             | -0.21               | 2.64E-01 |
| SupraMarginal_L      | 0.05                | 7.54E-01 | Frontal_Inf_Oper_R   | 0.06                | 7.02E-01 | Lingual_L            | 0.08                | 6.86E-01 | Temporal_Mid_L       | -0.22               | 2.55E-01 |
| Frontal_Mid_R        | 0.05                | 7.60E-01 | Temporal_Pole_Sup_L  | 0.03                | 8.54E-01 | Rolandic_Oper_L      | 0.06                | 7.65E-01 | Cingulum_Post_R      | -0.23               | 2.36E-01 |
| Olfactory_R          | 0.04                | 7.96E-01 | Precuneus_R          | 0.02                | 9.20E-01 | Temporal_Sup_L       | 0.05                | 8.00E-01 | Frontal_Inf_Oper_R   | -0.23               | 2.32E-01 |
| Temporal_Pole_Mid_R  | 0.03                | 8.35E-01 | Precuneus_L          | 0.01                | 9.34E-01 | Heschl_R             | 0.02                | 8.98E-01 | Temporal_Sup_R       | -0.25               | 1.87E-01 |
| SupraMarginal_R      | 0.02                | 8.93E-01 | Frontal_Mid_R        | 0.00                | 1.00E+00 | Frontal_Inf_Orb_R    | 0.02                | 9.31E-01 | Insula_R             | -0.26               | 1.80E-01 |
| Heschl_L             | 0.01                | 9.50E-01 | Cingulum_Ant_L       | 0.00                | 9.97E-01 | Precuneus_L          | 0.02                | 9.35E-01 | Cingulum_Mid_R       | -0.26               | 1.67E-01 |
| Frontal_Med_Orb_R    | 0.01                | 9.55E-01 | Cingulum_Post_R      | -0.03               | 8.61E-01 | Paracentral_Lobule_R | 0.01                | 9.51E-01 | Calcarine_R          | -0.28               | 1.49E-01 |
| Frontal_Inf_Oper_R   | 0.01                | 9.64E-01 | Lingual_R            | -0.03               | 8.59E-01 | Temporal_Pole_Mid_L  | 0.01                | 9.56E-01 | Frontal_Inf_Tri_L    | -0.29               | 1.21E-01 |
| Cingulum_Ant_R       | -0.01               | 9.62E-01 | Rectus_L             | -0.04               | 8.34E-01 | Paracentral_Lobule_L | -0.01               | 9.69E-01 | Occipital_Inf_L      | -0.32               | 9.48E-02 |
| Parietal_Sup_L       | -0.01               | 9.29E-01 | Insula_R             | -0.04               | 8.08E-01 | Postcentral_R        | -0.01               | 9.66E-01 | Frontal_Sup_Orb_L    | -0.32               | 8.96E-02 |
| Temporal_Pole_Mid_L  | -0.02               | 9.16E-01 | Olfactory_L          | -0.04               | 7.91E-01 | Supp_Motor_Area_R    | -0.02               | 9.16E-01 | Paracentral_Lobule_R | -0.32               | 8.71E-02 |
| Cingulum_Post_R      | -0.02               | 8.99E-01 | Rectus_R             | -0.05               | 7.80E-01 | Olfactory_L          | -0.05               | 7.88E-01 | Heschl_L             | -0.33               | 8.41E-02 |
| Cuneus_R             | -0.07               | 6.55E-01 | Frontal_Inf_Tri_R    | -0.07               | 6.73E-01 | Frontal_Inf_Tri_R    | -0.06               | 7.50E-01 | Cingulum_Ant_L       | -0.33               | 7.97E-02 |
| Temporal_Pole_Sup_R  | -0.09               | 5.88E-01 | Cuneus_R             | -0.10               | 5.52E-01 | Fusiform_L           | -0.08               | 6.86E-01 | Frontal_Sup_Medial_L | -0.34               | 7.07E-02 |
| Calcarine_L          | -0.11               | 4.93E-01 | Rolandic_Oper_L      | -0.11               | 5.21E-01 | Cingulum_Ant_L       | -0.09               | 6.54E-01 | Fusiform_R           | -0.35               | 6.58E-02 |
| Precuneus_L          | -0.13               | 4.53E-01 | Cuneus_L             | -0.13               | 4.28E-01 | Frontal_Sup_Medial_R | -0.10               | 6.21E-01 | Cingulum_Mid_L       | -0.35               | 6.45E-02 |
| Occipital_Sup_R      | -0.17               | 3.20E-01 | Paracentral_Lobule_R | -0.16               | 3.33E-01 | Frontal_Med_Orb_L    | -0.10               | 5.88E-01 | Rolandic_Oper_R      | -0.36               | 5.56E-02 |
| Rectus_L             | -0.17               | 3.07E-01 | Heschl_R             | -0.19               | 2.54E-01 | Frontal_Sup_Medial_L | -0.13               | 5.07E-01 | Calcarine_L          | -0.36               | 5.42E-02 |
| Supp_Motor_Area_R    | -0.17               | 3.00E-01 | Frontal_Inf_Tri_L    | -0.20               | 2.36E-01 | Cuneus_L             | -0.13               | 4.95E-01 | Frontal_Mid_Orb_R    | -0.37               | 4.77E-02 |
| Rolandic_Oper_R      | -0.19               | 2.49E-01 | Temporal_Pole_Mid_R  | -0.22               | 1.91E-01 | Olfactory_R          | -0.13               | 4.91E-01 | Frontal_Med_Orb_L    | -0.37               | 4.71E-02 |
| Precentral_R         | -0.20               | 2.39E-01 | Precentral_R         | -0.22               | 1.89E-01 | Occipital_Sup_L      | -0.14               | 4.64E-01 | Temporal_Mid_R       | -0.39               | 3.78E-02 |
| Rolandic_Oper_L      | -0.20               | 2.21E-01 | Calcarine_L          | -0.24               | 1.46E-01 | Lingual_R            | -0.14               | 4.60E-01 | Frontal_Inf_Orb_R    | -0.39               | 3.56E-02 |
| Postcentral_R        | -0.22               | 1.89E-01 | Postcentral_L        | -0.26               | 1.18E-01 | Frontal_Sup_Orb_R    | -0.18               | 3.57E-01 | Temporal_Pole_Sup_L  | -0.40               | 3.24E-02 |
| Frontal_Inf_Tri_R    | -0.22               | 1.76E-01 | Temporal_Sup_L       | -0.26               | 1.12E-01 | Frontal_Med_Orb_R    | -0.19               | 3.22E-01 | Rolandic_Oper_L      | -0.40               | 3.01E-02 |
| Supp_Motor_Area_L    | -0.23               | 1.65E-01 | Calcarine_R          | -0.30               | 6.95E-02 | Frontal_Inf_Orb_L    | -0.24               | 2.12E-01 | Postcentral_L        | -0.41               | 2.77E-02 |
| Precentral_L         | -0.25               | 1.27E-01 | Supp_Motor_Area_L    | -0.33               | 4.01E-02 | Heschl_L             | -0.25               | 1.89E-01 | Temporal_Pole_Mid_R  | -0.47               | 9.61E-03 |
| Temporal_Sup_R       | -0.28               | 8.36E-02 | Temporal_Pole_Sup_R  | -0.41               | 1.15E-02 | Cingulum_Ant_R       | -0.27               | 1.59E-01 | Temporal_Sup_L       | -0.47               | 9.34E-03 |
| Temporal_Pole_Sup_L  | -0.29               | 7.60E-02 | Rolandic_Oper_R      | -0.44               | 6.29E-03 | Postcentral_L        | -0.32               | 9.54E-02 | Frontal_Inf_Oper_L   | -0.48               | 9.06E-03 |
| Temporal_Sup_L       | -0.31               | 5.54E-02 | Frontal_Sup_Medial_L | -0.45               | 4.94E-03 | SupraMarginal_L      | -0.32               | 9.04E-02 | Cingulum_Ant_R       | -0.50               | 5.54E-03 |
| Frontal_Inf_Oper_L   | -0.38               | 2.03E-02 | Olfactory_R          | -0.50               | 1.47E-03 | Rectus_L             | -0.41               | 2.79E-02 | Frontal_Inf_Orb_L    | -0.51               | 4.67E-03 |
| Rectus_R             | -0.42               | 9.11E-03 | Frontal_Sup_L        | -0.51               | 1.14E-03 | Temporal_Pole_Sup_L  | -0.42               | 2.46E-02 | Rectus_L             | -0.52               | 3.84E-03 |
| Frontal_Sup_Medial_L | -0.48               | 2.17E-03 | Frontal_Sup_R        | -0.54               | 4.86E-04 | Temporal_Pole_Mid_R  | -0.57               | 1.20E-03 | Temporal_Pole_Sup_R  | -0.55               | 2.07E-03 |
| Postcentral_L        | -0.56               | 2.59E-04 | Frontal_Inf_Oper_L   | -0.65               | 8.16E-06 | Temporal_Pole_Sup_R  | -0.58               | 1.02E-03 | Lingual_L            | -0.65               | 1.16E-04 |
| Frontal_Sup_Medial_R | -0.64               | 1.84E-05 |                      |                     | Rectus_R | -0.62                | 3.19E-04            | Rectus_R | -0.72                | 1.30E-05            |          |
